# Supplementary material for: Distinct signatures of gut microbiome and metabolites associated with significant fibrosis in non-obese NAFLD
Source: PubMed Central journal article supplement (PMC7536225; doi:10.1038/s41467-020-18754-5), 2020-10-05
Supplement: 41467_2020_18754_MOESM1_ESM.pdf [file 41467_2020_18754_MOESM1_ESM.pdf]

1 **Supplemental information**

2

3 **Distinct signatures of gut microbiome and metabolites**

4 **associated with significant fibrosis in biopsy-proven non-**

5 **obese NAFLD**

6 **Lee et al.**

## 7 **Supplementary Methods**

### 8 ***Human subject***

9 We utilized the data from the 'Boramae NAFLD cohort (NCT 02206841)' study. The  
10 homeostasis model assessment of insulin resistance (HOMA-IR) and adipose tissue  
11 insulin resistance (adipo-IR) were calculated as described elsewhere<sup>1,2</sup>. The fibrosis 4  
12 index (FIB-4), a non-invasive fibrosis marker, was calculated using the appropriate  
13 equation<sup>3</sup>. We obtained two different liver tissue samples at the time of liver biopsy  
14 for a solid liver mass: one sample from the hepatic lesion and the other from the  
15 surrounding normal liver parenchyma. Liver biopsy performed in these controls  
16 showed <5% macrovesicular steatosis with no histological evidence of NASH<sup>4</sup>.  
17 Among the eligible subjects, liver biopsy was performed if at least two of the  
18 following risk factors were present: high triglycerides levels; low high-density  
19 lipoprotein (HDL)-cholesterol level; abdominal obesity; hypertension; the presence  
20 of diabetes mellitus and/or insulin resistance; or clinically suspected NASH or hepatic  
21 fibrosis. This study was performed in accordance with the ethical guidelines of the  
22 1975 Declaration of Helsinki for the participation of human subjects and was  
23 approved by the Institutional `Review Board of Boramae Medical Center (IRB No. 26-  
24 2017-48). Written informed consent was obtained from all of the study subjects.

25

### 26 ***Host genotyping***

27 Established risk alleles for NAFLD were selected for genotyping as described  
28 elsewhere<sup>5</sup>. Specifically, the *PNPLA3* rs738409 C>G (I148M)<sup>6-8</sup>, *TM6SF2* rs58542926  
29 C>T (E167K)<sup>9,10</sup>, *MBOAT7-TMC4* C>T rs641738<sup>11,12</sup>, and *SREBF-2* rs133291 C>T<sup>13</sup>  
30 single-nucleotide polymorphisms were genotyped in the entire cohort by using  
31 TaqMan 50-nuclease assays (Life Technologies, Carlsbad, CA, USA) according to the  
32 manufacturer's instructions. Hardy–Weinberg equilibrium was confirmed using the  
33 chi-square test.

34

### 35 ***Microbiome analysis using 16S rRNA sequencing***

36 Subjects' stool samples were immediately frozen at –80°C and transferred to the  
37 laboratory for microbiome analysis. Two hundred-milligram aliquots of stool samples  
38 were used for analysis, and DNA in stool samples was extracted using a QIAamp DNA

39 Stool Mini Kit (Qiagen, Hilden, Germany). Sequencing was performed using the  
40 MiSeq platform (Illumina, San Diego, CA), and further processing of raw sequencing  
41 data was performed using the QIIME pipeline (v. 1.8.0). To improve the DNA  
42 extraction efficiency, an additional bead-beating step was included. After  
43 preprocessing the samples, the remaining steps were performed using a QIAcube  
44 (Qiagen) instrument to maintain consistent efficiency. PCR amplification of the  
45 extracted DNA was performed with the Illumina-adapted universal primers  
46 515F/806R targeting the V4 region of the 16S rRNA gene<sup>14</sup>, and the amplicon was  
47 purified using the QIAquick PCR Purification Kit (Qiagen). Quantification of the  
48 amplicon was performed using the KAPA Library Quantification Kit (KAPA Biosystems,  
49 Boston, MA, USA). The samples were then pooled and used as input for the MiSeq  
50 platform (Illumina, San Diego, CA, USA). A total of 7,276,554 sequencing reads were  
51 generated from 202 samples for an average of 36,022 reads per sample. Sequencing  
52 data were processed using the QIIME pipeline (v. 1.8.0)<sup>15</sup>. Operational taxonomic  
53 unit (OTU) picking and assigning sequences to an OTU were performed at the 97%  
54 similarity level against the gg\_13\_5 Greengenes database<sup>16</sup>. Representative  
55 sequences were chosen using UCLUST software and aligned through the PyNAST  
56 algorithm (v. 1.2.2)<sup>17</sup>. The ribosomal database project classifier<sup>18</sup> was used to assign  
57 taxa to OTUs, and chimeric sequences were removed using the ChimeraSlayer  
58 algorithm (v. microbiomutil-r20110519)<sup>19</sup>. The relative abundance table from the  
59 phylum to genus level was used for further microbiome analysis.

60

### 61 ***Metagenomic shotgun sequencing***

62 DNA in stool samples was extracted using a QIAamp DNA Stool Mini Kit (Qiagen,  
63 Hilden, Germany) and quantified using a Quant-iT™ PicoGreen™ dsDNA Assay kit  
64 (Thermo Fisher Scientific, Waltham, MA, USA). Integrity of total DNA was checked  
65 using gel electrophoresis. Sequencing libraries were prepared using an Illumina  
66 Nextera DNA Flex Library Prep Kit (Illumina, San Diego, CA, USA) and was checked  
67 using a Caliper LabChip GX analyzer (PerkinElmer, Waltham, MA, USA). Sequencing  
68 was performed on an Illumina NextSeq 500 platform (Illumina) to produce 75 bp  
69 paired-end sequences. Metagenomes averaged  $8,566,242 \pm 1,378,228$  reads (mean  $\pm$   
70 s.d.) per sample before filtering and  $8,131,721 \pm 1,314,620$  reads per sample

71 afterward. To remove low-quality reads and human contamination, sequence reads  
72 were processed with KneadData (v. 0.6.1), which uses the Trimmomatic (v. 0.33)<sup>20</sup>  
73 and Bowtie2 (v. 2.3.2)<sup>21</sup>. Taxonomic profiling of the metagenome was performed  
74 with MetaPhlAn2 (v. 2.6.0)<sup>22</sup> and functional profiling was performed with HUMAnN2  
75 (v. 0.11.1)<sup>23</sup> using the UniRef50<sup>24</sup> database.

76

#### 77 ***Co-occurring and co-excluding interactions in the microbial ecological network***

78 For network analysis, correlations were measured using the SparCC (v. 0.1.0)  
79 package in R (v. 3.5.0)<sup>25</sup> and were visualized using Cytoscape (v. 3.7.1)<sup>26</sup>. In the  
80 current study, the raw OTU table was processed in 3 steps: 1. rarefaction with  
81 12,000 sequences; 2. collapsing to the family level; and 3. identifying OTUs present  
82 in more than 15% of all of the subjects. Pseudo *P*-values were calculated with 500  
83 bootstraps in the R package, and *P*-values (*q*-value) adjusted by Benjamini and  
84 Hochberg's FDR less than 0.25 were included.

85

#### 86 ***Bile acid measurements using a UPLC/Q-TOF system***

87 Two hundred-milligram aliquots of stool samples were thawed, and 4 volumes of  
88 distilled water were added followed by vortexing at room temperature for 5 min  
89 until the samples were homogenized. After centrifugation at 14,000*g* for 5 min, the  
90 supernatants were transferred to new tubes for further analysis. One volume of 80%  
91 methanol (Merk Millipore, Billerica, MA, USA) was added to the supernatant,  
92 followed by vortexing for 1 min. Samples were sonicated for 3 min and centrifuged  
93 at 14,000*g* for 2 min. The supernatants were transferred to new tubes. For second  
94 extraction, 1 mL of 100% methanol was added to the precipitate. After extraction  
95 using a homogenizer for 30 min with 15 Hz, the remaining solid material was  
96 removed by centrifugation (14,000 *g* for 3 min). Supernatant was added to the  
97 existing tube. The combined supernatant was evaporated using a vacuum  
98 concentrator (Eppendorf, Hamburg, Germany) for more than 9 hours. Finally,  
99 samples were resuspended in 500 mL 55%/45% methanol/water (v/v) and then  
100 filtered using a 0.22- $\mu$ m filter (Merck Millipore). Mouse bile acid measurements from  
101 cecum samples were identical to those from humans except that 10 volumes of 80%

102 MeOH were added to the cecum sample for the first extraction. Serially diluted  
103 mixtures of bile acids were used as a standard.  
104 Cholic acid (CA), chenodeoxycholic acid (CDCA), deoxycholic acid (DCA), lithocholic  
105 acid (LCA), ursodeoxycholic acid (UDCA), taurocholic acid (TCA), tauroolithocholic acid  
106 (TLCA), taurodeoxycholic acid (TDCA), tauroursodeoxycholic acid (TUDCA),  
107 glycochenodeoxycholic acid (GCDCA), glycodeoxycholic acid (GDCA), and  
108 glyoursodeoxycholic acid (GUDCA) were purchased from Sigma-Aldrich (St.Louis,  
109 MO, USA). Glycocholic acid (GCA) was purchased from Calbiochem (San Diego, CA,  
110 USA).  $\alpha$ -muricholic acid ( $\alpha$ -MCA),  $\beta$ -muricholic Acid ( $\beta$ -MCA),  $\omega$ -muricholic acid ( $\omega$ -  
111 MCA), tauro- $\alpha$ -muricholic acid (T $\alpha$ -MCA), and tauro- $\beta$ -muricholic acid (T $\beta$ -MCA)  
112 were purchased from Cayman Chemical (Ann Arbor, MI, USA). After the separation  
113 of bile acids according to Buffie's method<sup>27</sup>, profiling of stool bile acids was  
114 performed using a Q-TOF mass spectrometer (Waters Micromass Technologies,  
115 Manchester, UK). Quantification of bile acids was performed using QuanLynx™  
116 software (v. 4.1) and MassLynx™ (v. 4.1) (Waters Corp., Milford, MA, USA).

117

#### 118 ***Stool short-chain fatty acid (SCFA) measurements using the GC-FID system***

119 Supernatants described in bile acid measurements were also used for SCFA  
120 measurements. For fecal SCFA measurements, 5% of 95% sulfuric acid (Sigma-Aldrich)  
121 was added to the supernatants for acidification, followed by vortexing for 5 min at  
122 room temperature. To extract volatile materials, 10% internal standard (1% 2-methyl  
123 pentanoic acid) (Sigma-Aldrich) and 1 volume of anhydrous ethyl ether (Sigma-  
124 Aldrich) were added. The samples were vortexed for 1 min and then centrifuged at  
125 14,000g for 5 min. The upper layer was carefully moved to a new tube, and a  
126 mixture containing 10 mM acetate (Sigma-Aldrich), butyrate (Sigma-Aldrich), and  
127 propionate (Sigma-Aldrich) was used as the standard for SCFA analysis. For mouse  
128 SCFAs measurements from cecum samples, 4 volumes of distilled water were added  
129 to samples, followed by vortexing for 5 min. Five percent of 95% sulfuric acid was  
130 added to the samples for acidification, followed by stabilization for 5 min. After  
131 centrifugation at 14,000g for 5 min, the supernatants were transferred to a new  
132 tube. Other steps were identical to human stool SCFAs measurements. SCFAs were

133 measured by using an Agilent Technologies 7890A GC system (Agilent Technologies,  
134 Santa Clara, CA, USA) according to David's method<sup>28</sup>.

135

### 136 ***Prediction of significant fibrosis by the ROC curve analysis***

137 To validate the ability of microbiome-based biomarkers to predict significant fibrosis,  
138 the area under the receiver operating characteristic curve (AUC) method was used.

139 The relative abundances of two family-level bacteria identified in the current study,  
140 four metabolites (CA, CDCA, UDCA, and propionate), and FIB-4 were used as inputs  
141 for the AUC, and the combination of these factors was calculated using binary  
142 logistic regression in SPSS software (v. 25.0) (SPSS Inc., Armonk, NY, USA). The  
143 AUROC comparison was performed by the DeLong test using MedCalc software (v.  
144 18.2.1) (MedCalc Software BVBA, Mariakerke, Belgium).

145

### 146 ***Mouse intervention study***

147 Six-week-old of male C57BL/6N mice were purchased from Orient Bio (Seongnam,  
148 Republic of Korea), and 5 week-old male C57BLKS/J-db/db and control C57BLKS/J-  
149 m+/db mice were purchased from SLC (Shizuoka, Japan). The mice were housed in a  
150 conventional animal facility according to university guidelines. All of the animal  
151 procedures were approved by the Institutional Animal Care and Use Committee.  
152 After 1 weeks of acclimatization on a standard chow diet, the mice were treated  
153 with streptomycin (1g/L) in drinking water for the colonization of administered  
154 bacteria. For the subsequent 5 weeks, the mice were fed the methionine-and  
155 choline-deficient, L-amino acid diet (MCD) (Research Diet, New Brunswick, NJ, USA;  
156 Cat. no.: A02082002B). *db/db* mice were fed a normal chow diet.

157 For the subsequent 8 weeks, the mice were fed the choline-deficient, L-amino acid-  
158 defined, high-fat diet (CDAHFD) (Research Diet, Cat. no.: A06071302). The mice were  
159 gavaged daily with 200  $\mu$ L of either bacteria ( $10^9$  CFU/mouse in PBS) or sham. An  
160 intraperitoneal glucose tolerance test (ipGTT) of *db/db* mice was performed after  
161 three weeks of bacteria challenge. The mice were fasted for 16 h with free access to  
162 water and a solution of glucose (1 g glucose/kg body weight) was administered by  
163 intraperitoneal injection. Blood glucose was measured at different time points in tail  
164 vein blood using a glucometer (Accu-Chek Performa, Roche Diagnostic, Mannheim,

165 Germany). Serum ALT and AST levels were measured using a chemical analyzer (Fuji  
166 DRI-CHEM 3500i, Fuji Photo Film, Tokyo, Japan) or commercial kits (EnzyChrom  
167 Alanine Transaminase Assay kit, BioAssay Systems, Hayward, CA, USA; EnzyChrom  
168 Aspartate Transaminase Assay kit, BioAssay Systems). Serum insulin levels were  
169 measured using an Ultra Sensitive Mouse Insulin ELISA kit (Crystal Chem, Downers  
170 Grove, IL, USA). For quantitative PCR, total RNA from liver samples was extracted  
171 using the easy-spin Total RNA Extraction Kit (iNtRON Biotechnology, Seongnam,  
172 Republic of Korea) and reverse transcribed to cDNA using a High Capacity RNA-to-  
173 cDNA kit (Thermo Fisher Scientific, Waltham, MA, USA). Quantitative PCR was  
174 performed using the SYBR Green qPCR Master mix (Thermo Fisher Scientific) and the  
175 Quantstudio 6 Flex qPCR System. The primer sequences were as follows: *Cyclophilin*  
176 A forward: 5'-TGGAGAGCACCAAGACAGACA-3', reverse: 5'-  
177 TGCCGGAGTCGACAATGAT-3'; *Col1a1* forward: 5'-ACCTGTGTGTTCCCTACTCA-3',  
178 reverse: 5'-GACTGTTGCCTTCGCCTCTG-3'; *Timp1* forward: 5'-  
179 GGTGTGCACAGTGTTCCTGTTT-3', reverse: 5'-TCCGTCCACAAACAGTGAGTGTC-3';  
180 and  $\alpha$ -SMA forward: 5'-GGCTCTGGGCTCTGTAAGG-3', reverse: 5'-  
181 CTCTTGCTCTGGGCTTCATC-3'.

182

### 183 ***Cultivation of bacteria***

184 *R. faecis* and *V. parvula* were distributed from KCTC (KCTC nos. 5757 and 5019). *R.*  
185 *bromii* was distributed from ATCC (ATCC no. 27255). *M. funiformis* was isolated from  
186 healthy Korean adult feces. Bacteria were cultivated under anaerobic conditions  
187 (Coy Laboratory Products Inc., Grass Lake, MI, USA). *R. faecis* and *M. funiformis* were  
188 cultivated in YBHI medium<sup>29</sup>. *V. parvula* was cultivated in GAM medium (MBcell,  
189 Seoul, Korea) supplemented with sodium lactate solution (15g/1L, Sigma-Aldrich)  
190 and putrescine (3mg/1L, Sigma-Aldrich). *M. funiformis* was cultivated in YCFAG  
191 medium<sup>30</sup>. Bacterial cells were harvested by centrifugation and washed using 1x PBS  
192 (+0.5% cysteine). After repeated washing, bacterial cells were resuspended using 1x  
193 PBS for oral gavage (final concentration (10<sup>9</sup> CFU/mouse).

194

### 195 ***Mouse histological analysis***

196 After euthanasia, live samples were excised and fixed in 10% formalin solution  
197 (Sigma-Aldrich). Hematoxylin and eosin (H&E) and Sirius red staining were  
198 performed at a core facility (LOGONE Bio Convergence Research Foundation, Seoul,  
199 Republic of Korea). Stained whole-slide images were analyzed using the Panoramic  
200 Viewer (3DHISTECH, Budapest, Hungary). For calculating collagen proportionate area  
201 (CPA), eight images per group were randomly chosen and analyzed using ImageJ  
202 software (NIH, Bethesda, MD, USA; <http://imagej.nih.gov/ij>).

203

#### 204 ***Statistical analysis***

205 Statistical significance between two groups was calculated with the two-sided Mann-  
206 Whitney test. Among three groups, the Kruskal-Wallis test with Dunn's multiple  
207 comparisons test was performed using GraphPad Prism software Ver. 7.0d  
208 (GraphPad Software, San Diego, CA, USA).



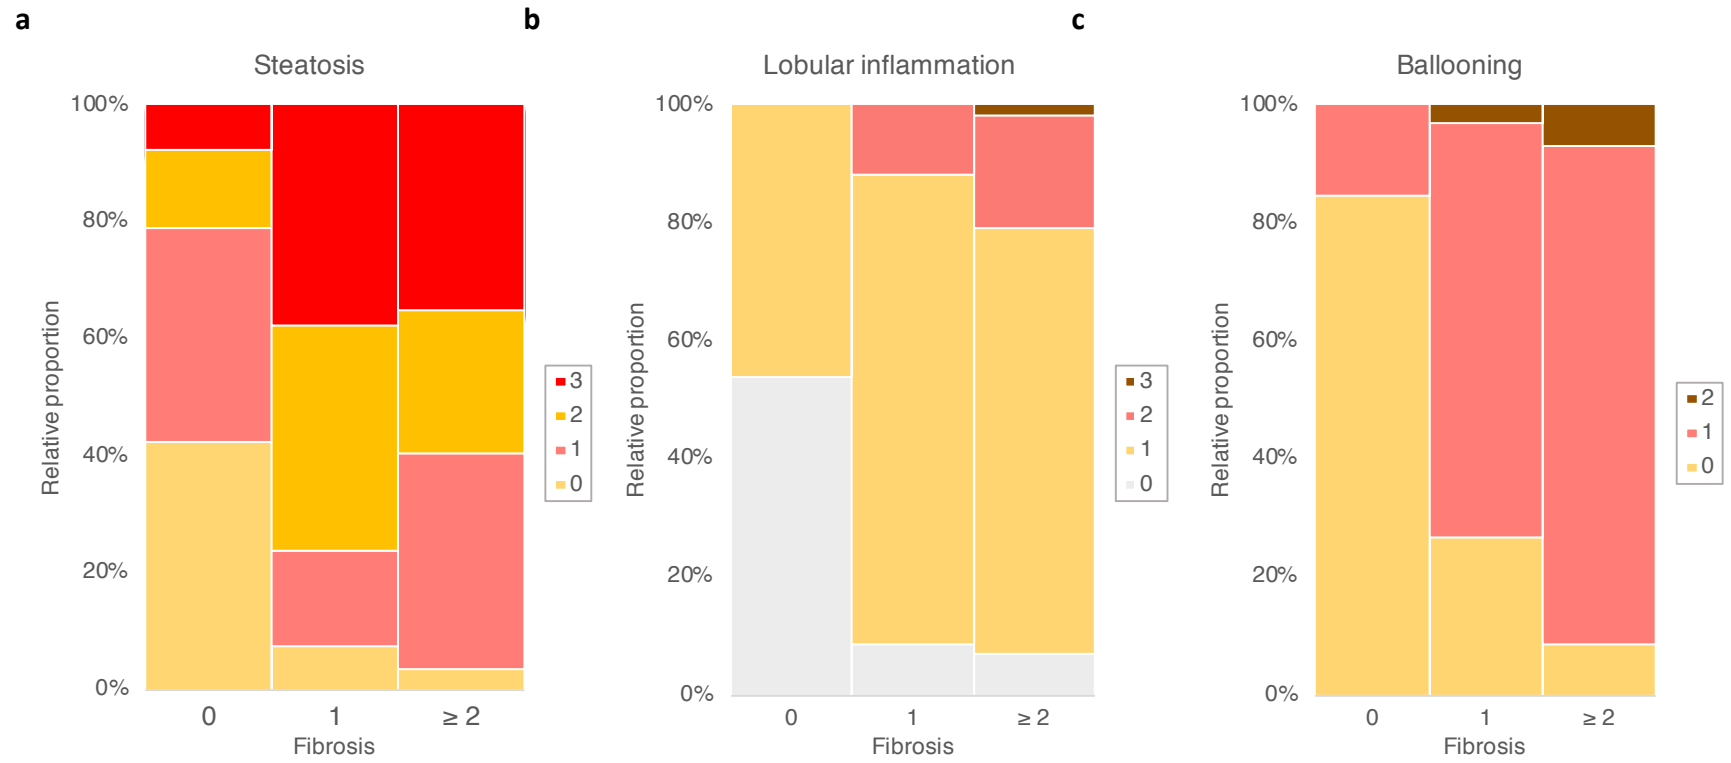

**Supplementary Figure 1 Histological distribution of study subjects stratified by fibrosis severity.** Relative proportions of histologic features, including (a) steatosis, (b) lobular inflammation, and (c) ballooning, are depicted as stacked bar plots ( $n=52$  (F0), 93 (F1), 57 (F $\geq 2$ )).

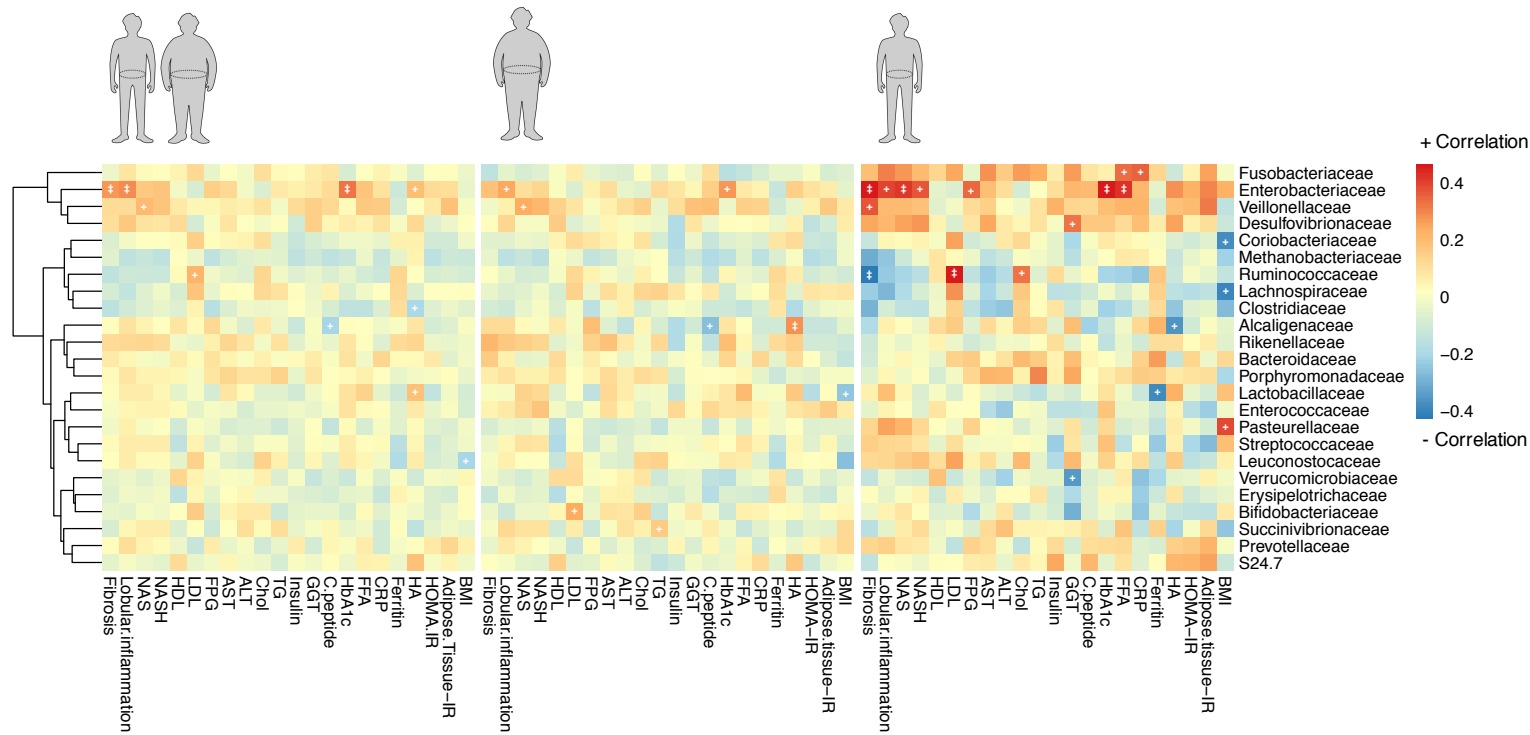

**Supplementary Figure 2 Correlations between microbial taxa and host metabolic markers in all, obese, and non-obese subjects.** The correlation coefficients between the relative abundances of 24 family taxa and 22 clinical metadata variables were calculated using a Spearman's nonparametric correlation and visualized using heatmap analysis. The color of the matrix denotes the degree of correlation between the taxa and metadata variables (all,  $n=202$ ; obese,  $n=138$ ; non-obese,  $n=64$ ).  $+P<0.05$ ,  $\#P<0.001$ . Abbreviations: BMI, body mass index; Adipose tissue-IR, adipose tissue insulin resistance; HOMA-IR, homeostasis model assessment of insulin resistance; HA, hyaluronic acid; hsCRP, high sensitivity C-reactive protein; FFA, free fatty acid; HbA1c, glycosylated hemoglobin; GGT, gamma-glutamyl transferase; TG, triglycerides; Chol, cholesterol; ALT, alanine transaminase; AST, aspartate transaminase; FPG, fasting plasma glucose; LDL, low-density lipoprotein; HDL, high-density lipoprotein; NAS, nonalcoholic fatty liver disease activity score.

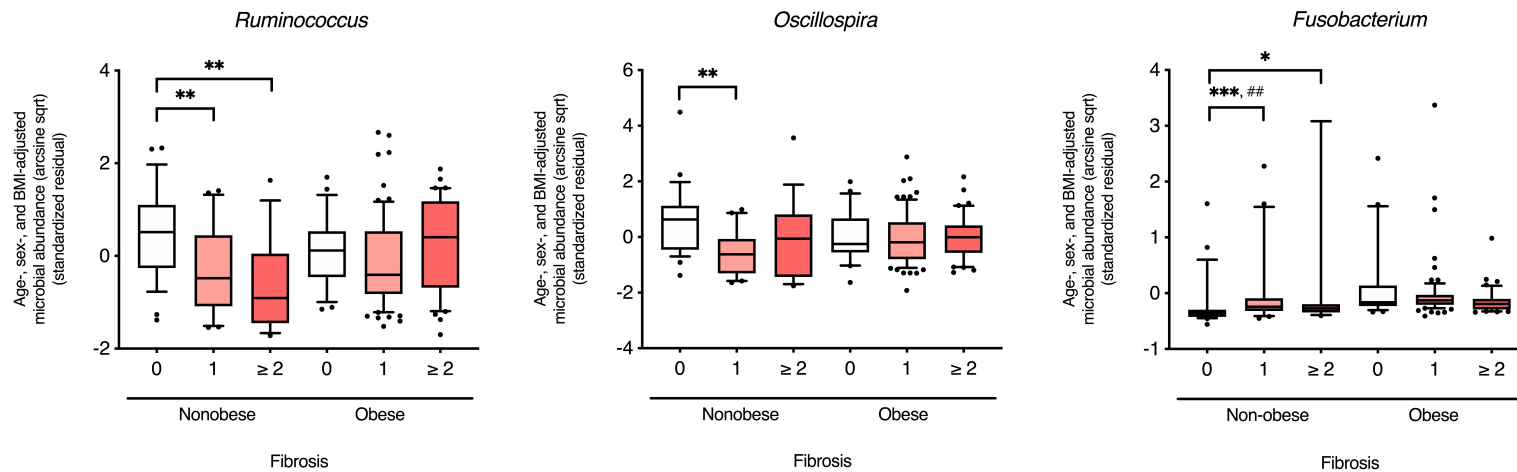

**Supplementary Figure 3 Associations between the relative abundances of specific gut microbial taxa at the genus level and fibrosis severity stratified by obesity status.** Arcsine-root transformed abundances of taxa were regressed against age, sex, and BMI according to fibrosis severity, and the standard residuals are expressed as box plots. The box plots indicate the median, 25th to 75th percentiles (boxes), and 10th to 90th percentiles (whiskers) [from left, *Ruminococcus*,  $P=0.0098$ ,  $0.0011$ ; *Oscillospira*,  $P=0.0027$ ; *Fusobacterium*,  $P=0.0002$ ,  $q=0.0449$ ,  $P=0.0458$ ; non-obese,  $n=27$  (F0), 20 (F1), 17 (F $\geq 2$ ); obese,  $n=25$  (F0), 73 (F1), 40 (F $\geq 2$ )]. Statistical analyses for multivariate associations were performed using the MaAsLin pipeline with false discovery rate (q value). \* $P<0.05$ , \*\* $P<0.01$ , \*\*\* $P<0.001$ , ## $q<0.05$

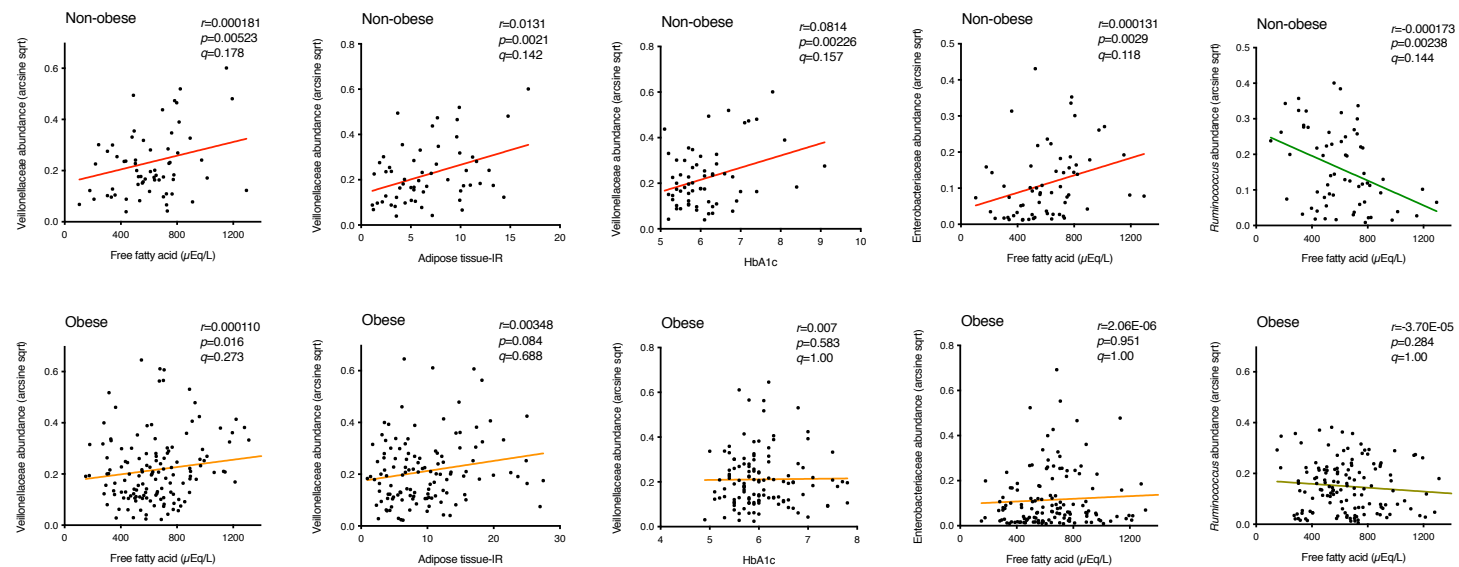

**Supplementary Figure 4 Associations between the relative abundances of specific gut microbiota and host metabolic markers in non-obese and obese subjects.** Associations between metabolic traits and the arcsine-root transformed abundances of bacteria were measured by multivariate association with linear models (MaAsLin) with adjustments for multiple comparisons (q value). Significant associations regressed against sex, age, and BMI are depicted. Lines represent the linear model fit.  $r$ , correlation coefficient (non-obese,  $n=64$ ; obese,  $n=138$ ). Abbreviations: Adipose tissue-IR, adipose tissue insulin resistance; HbA1c, glycosylated hemoglobin.

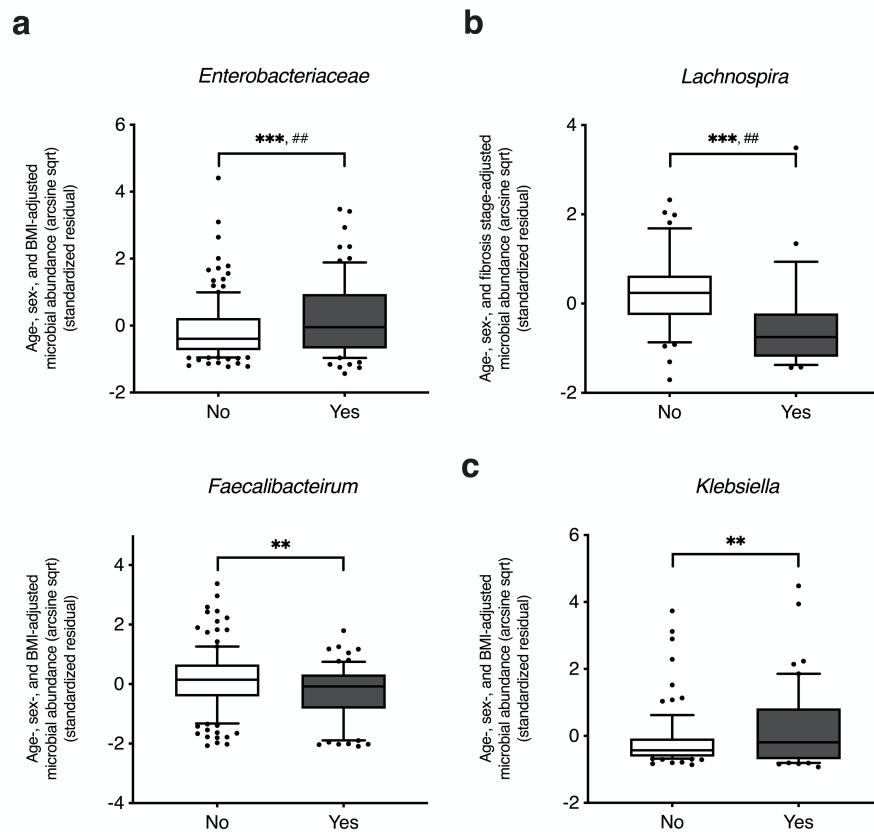

**Supplementary Figure 5 Associations between the relative abundances of specific gut microbiome components and the presence or absence of diabetes mellitus.** Arcsine-root transformed abundances of taxa were regressed against age, sex, and BMI according to diabetes mellitus, and the standard residuals are expressed as box plots (a, all; b, non-obese subjects; c, obese subjects). The box plots indicate the median, 25th to 75th percentiles (boxes), and 10th to 90th percentiles (whiskers) [(a)(top)  $P=0.0002$ ,  $q=0.0390$ , (bottom)  $P=0.0029$ ; (b)  $P>0.001$ ,  $q=0.0316$ ; (c)  $P=0.0026$ ], [(yes)  $n=72$ , (no)  $n=130$ ]. Statistical analyses for multivariate associations were performed using the MaAsLin pipeline with false discovery rate ( $q$  value). \* $P<0.05$ , \*\* $P<0.01$ , \*\*\* $P<0.001$ , ## $q<0.05$ . Source data are provided as a Source Data file.

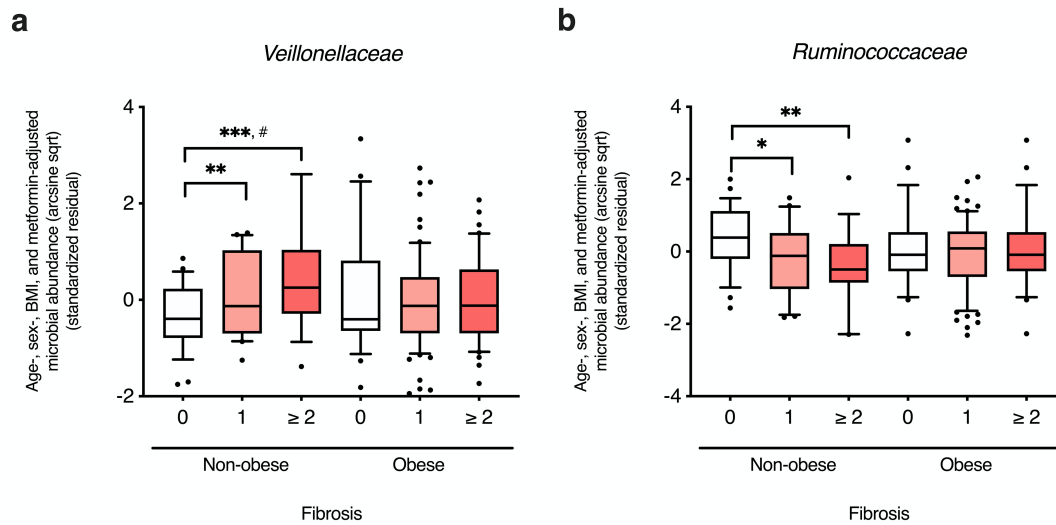

**Supplementary Figure 6 Associations between the relative abundances of specific gut microbiome components and the metformin use.** Arcsine-root transformed abundances of taxa were regressed against age, sex, BMI, and the use of metformin according to fibrosis severity, and the standard residuals are expressed as box plots (a, *Veillonellaceae*; b, *Ruminococcaceae*). The box plots indicate the median and 25th to 75th percentiles (boxes) and 10th to 90th percentiles (whiskers). Statistical analyses for multivariate associations were performed using the MaAsLin pipeline with false discovery rate (q value) [from left (a)  $P=0.0056$ ,  $0.0002$ ,  $q=0.0602$ ; (b)  $P=0.0313$ ,  $0.0012$ ], [non-obese,  $n=27$  (F=0), 20 (F=1), 17 (F $\geq 2$ ); obese,  $n=25$  (F=0), 73 (F=1), 40 (F $\geq 2$ )]. \* $P<0.05$ , \*\* $P<0.01$ , \*\*\* $P<0.001$ , # $q<0.10$ . Source data are provided as a Source Data file.

**a** Age, sex, BMI, and *PNPLA3*

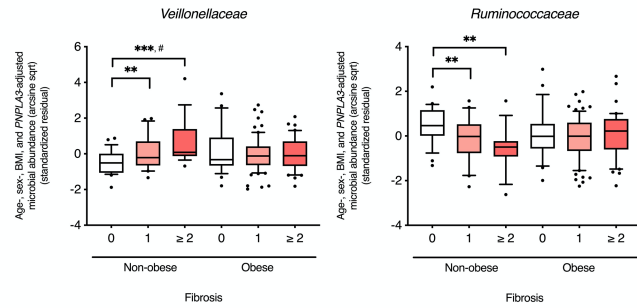

**b** Age, sex, BMI, and *TM6SF2*

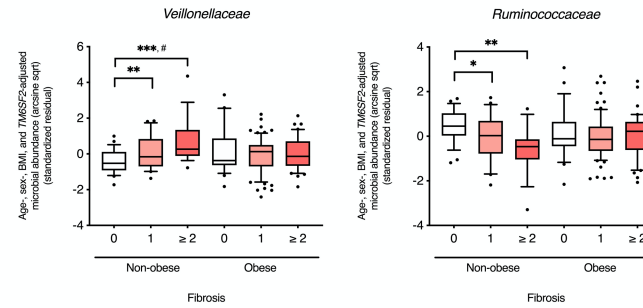

**c** Age, sex, BMI, and *MBOAT7-TMC4*

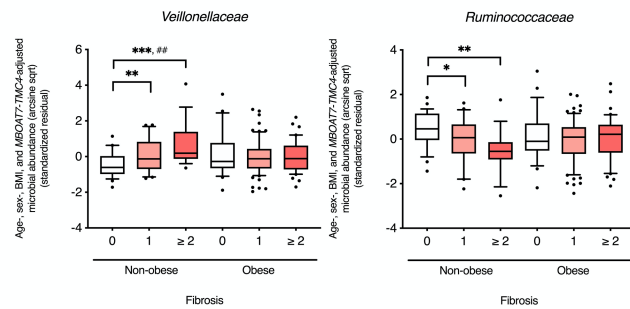

**d** Age, sex, BMI, and *SREBF-2*

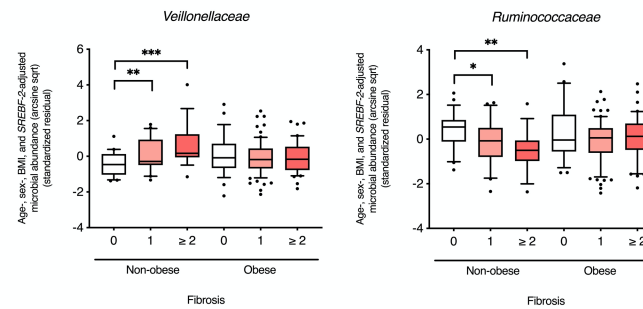

**Supplementary Figure 7 Multivariate associations between specific gut microbiome components and fibrosis severity adjusted for host genetic factors.** Arcsine-root transformed abundances of bacteria were regressed against age, sex, BMI, and (a) *PNPLA3*, (from left  $P=0.0052$ ,  $0.0005$ ,  $q=0.0805$ ,  $P=0.0321$ ,  $0.0018$ ) (b) *TM6SF2* (from left,  $P=0.0056$ ,  $0.0002$ ,  $q=0.0602$ ,  $P=0.0313$ ,  $0.0056$ ) (c) *MBOAT7-TMC4* (from left,  $P=0.0056$ ,  $0.0002$ ,  $q=0.0488$ ,  $P=0.0313$ ,  $0.0056$ ), and (d) *SREBF-2* (from left,  $P=0.0067$ ,  $0.0006$ ,  $0.0271$ ,  $0.0023$ ). Statistical significance was calculated using multivariate association with linear models (MaAsLin) with adjustments for multiple comparisons (q value). The box plots indicate the median and 25th to 75th percentiles (boxes) and 10th to 90th percentiles (whiskers)

[non-obese,  $n=27$  (F=0), 20 (F=1), 17 (F $\geq$ 2); obese,  $n=25$  (F=0), 73 (F=1), 40 (F $\geq$ 2)]. \* $P<0.05$ , \*\* $P<0.01$ , \*\*\* $P<0.001$ , # $q<0.10$ , ## $q<0.05$ .  
Source data are provided as a Source Data file.



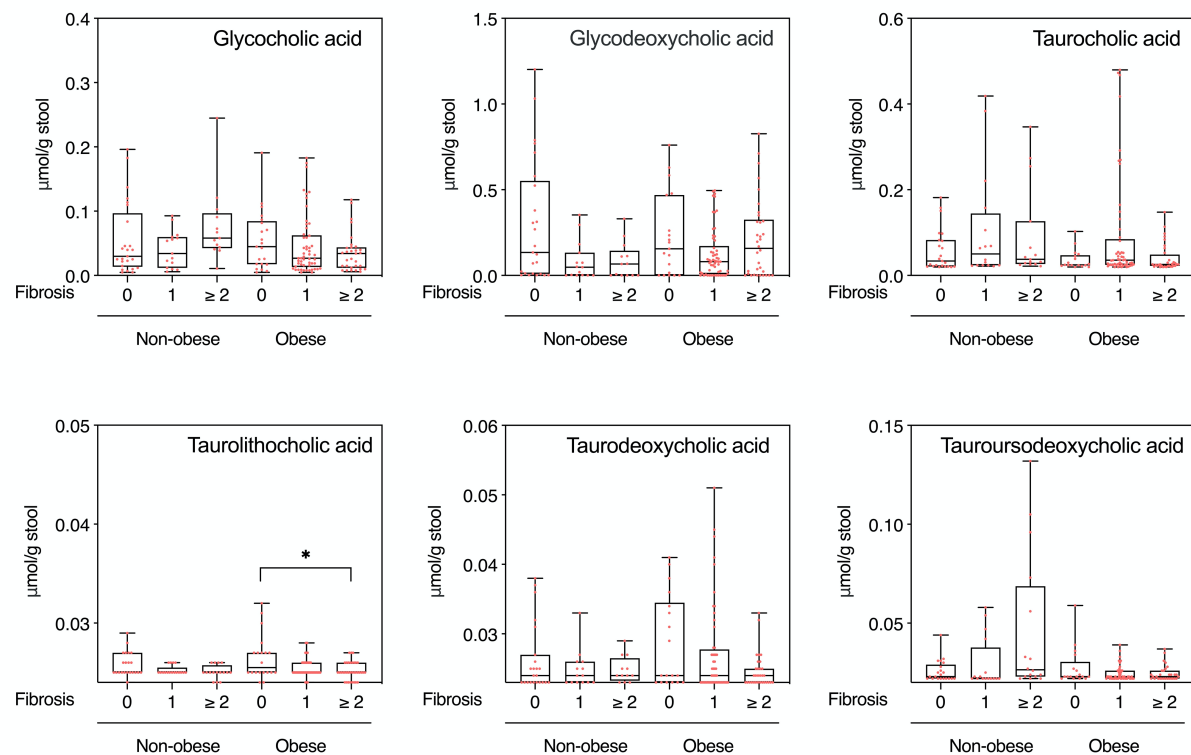

**Supplementary Figure 8 Comparison of stool conjugated bile acids levels stratified by fibrosis severity and obesity status.** The box plots represent the relative abundance of stool bile acid levels, which are stratified by fibrosis severity and obesity status. The box plots indicate the median and 25th to 75th percentiles (boxes) and minimum to maximum (whiskers) (tauroliithocholic acid,  $P=0.0479$ ) (non-obese,  $n=27$  (F0), 20 (F1), 17 (F $\geq 2$ ); obese,  $n=25$  (F0), 73 (F1), 40 (F $\geq 2$ )). Outliers were removed by the ROUT method (Q=1%) and data were analyzed using the nonparametric Kruskal-Wallis test with Dunn's multiple comparison test. \* $P<0.05$ , \*\* $P<0.01$ .

All

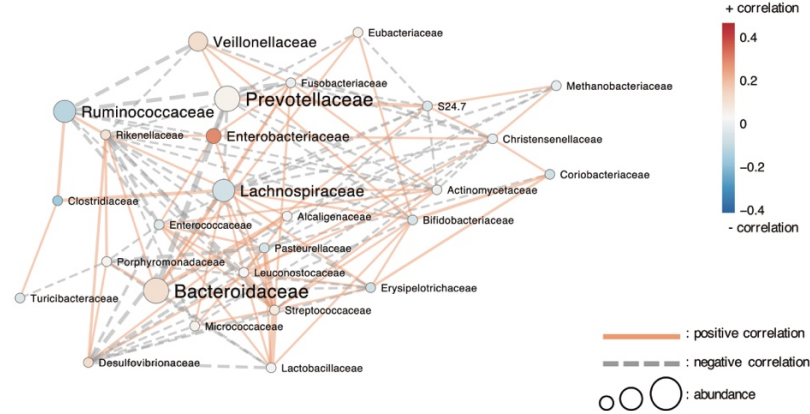

Obese

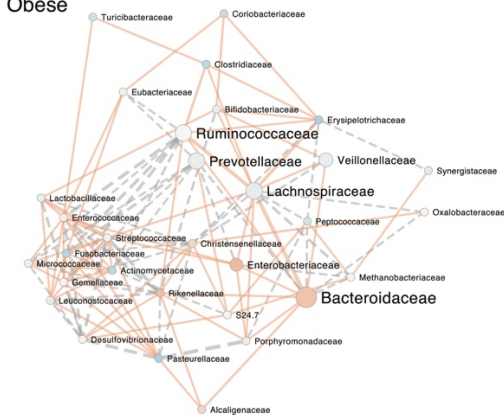

Non-obese

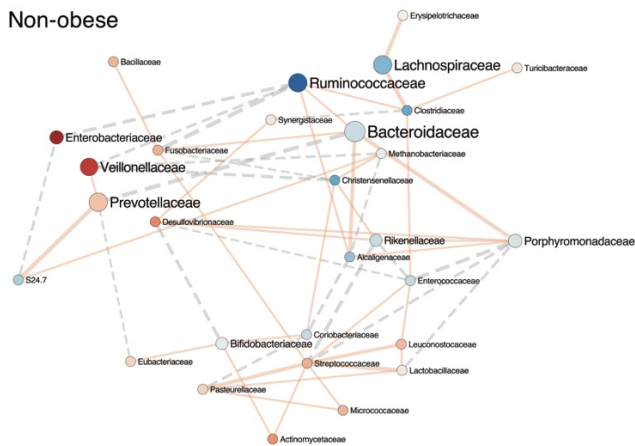

### Supplementary Figure 9 Co-occurrence analysis of the specific gut microbiota in all, obese, and non-obese subjects

Co-occurrence coefficients among family-level microbiota were calculated by SparCC and only significant networks ( $P < 0.05$ ) are depicted using Cytoscape. The solid line (orange) and dotted line (gray) indicate positive and negative correlations, respectively. The size of the node denotes the relative abundance of the bacteria, and the color indicates the degree of correlation with fibrosis severity. The  $P$ -value for each

coefficient was obtained by bootstrapping the data set 500 times and applying SparCC to each of those 500 data sets.

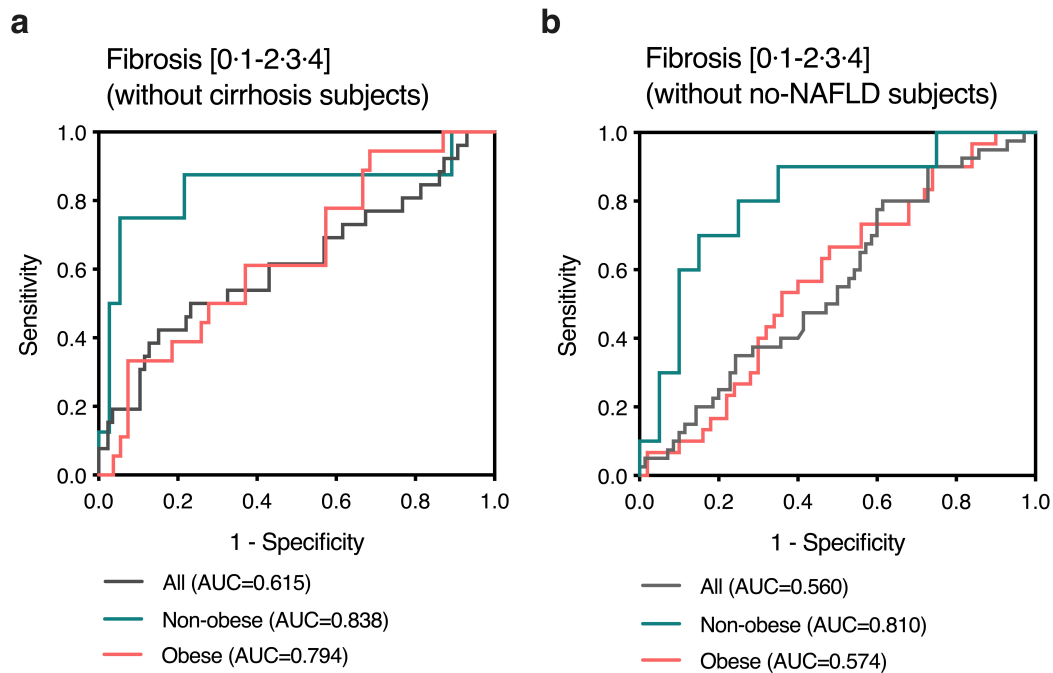

**Supplementary Figure 10 Receiver-operating characteristic (ROC) curves for the diagnosis of significant fibrosis after excluding cirrhotic or no-NAFLD subjects.**

ROC curves using the combination of two bacteria (*Veillonellaceae* and *Ruminococcaceae*) and four stool metabolites (CA, CDCA, UDCA, and propionate) were plotted for the diagnosis of significant fibrosis and the areas under the ROC curves (AUCs) were calculated. (a) Cirrhotic subjects were excluded for diagnosing significant fibrosis in all, non-obese, and obese subjects. (b) No-NAFLD subjects were excluded for diagnosing significant fibrosis in all, non-obese, and obese subjects.

### Bile salt hydrolase (*bsh*)

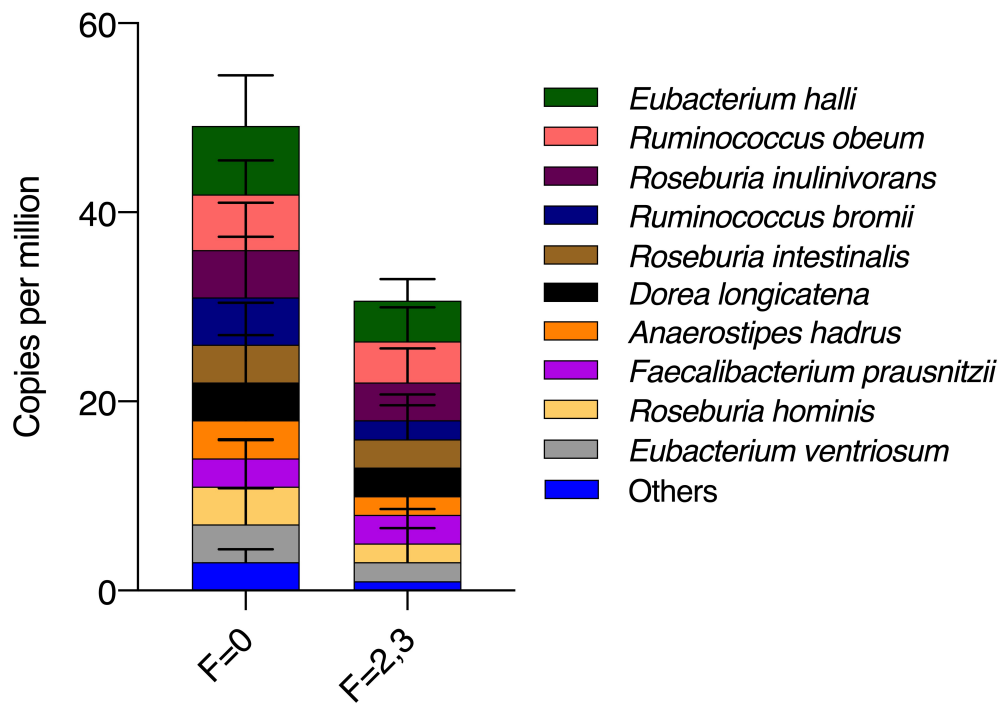

**Supplementary Figure 11 Contribution of microbial species to bile salt hydrolase (*bsh*) enzyme.** Species contribution was calculated using HUMAnN2 program (F0, n=25; F2–3, n=13). Top 10 contributors are depicted using a stacked bar plot and other contributors are assigned to 'Others'. The stacked bar plots indicate the means with SDs.

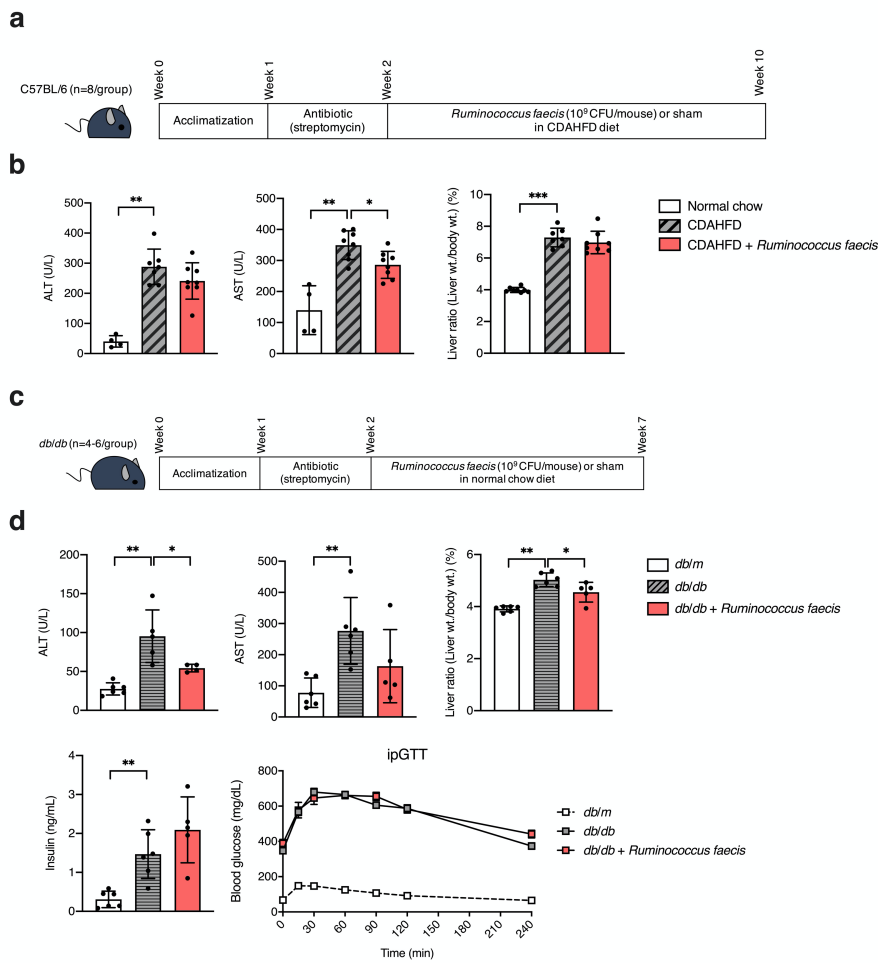

**Supplementary Figure 12 Effect of *Ruminococcus faecis* on liver damage using *db/db* and CDAHFD diet-induced NAFLD mouse models.** Mice were acclimated for 1 weeks on a standard chow diet. Then, they were treated with streptomycin (1 g/L) in drinking water for colonization of *Ruminococcus faecis*. Following 5 (*db/db*) or 8 (CDAHFD) weeks, mice were given daily 200  $\mu$ L of either bacteria ( $10^9$  CFU/mouse in PBS) or sham. (a) Scheme of the animal experiment using a CDAHFD-induced NAFLD mouse model. (b) Effects of *Ruminococcus faecis* on serum ALT, AST, and liver ratio (from left, ALT,  $P=0.0061$ ,  $n=4, 7, 8$ ; AST,  $P=0.0040, 0.0225$ ,  $n=4, 8, 8$ ; Liver ratio,  $P=0.0003$ ,  $n=8, 7, 8$ ). (c) Scheme of the animal experiment using a *db/db* mouse. (d) (Top) Effect of *Ruminococcus faecis* on serum ALT, AST, and liver ratio (from left, ALT,  $P=0.0043$ ,  $0.0493$ ,  $n=6, 5, 4$ ; AST,  $P=0.0022$ ,  $n=6, 6, 5$ ; Liver ratio,  $P=0.0022, 0.0303$ ,  $n=6, 6, 5$ ; Insulin,  $P=0.0043$ ,  $n=6, 6, 5$ ). (Bottom) Insulin and ipGTT. The bar graphs indicate the

mean with SD. Statistical analysis was performed using the two-sided nonparametric Mann-Whitney test. \* $P < 0.05$ , \*\* $P < 0.01$

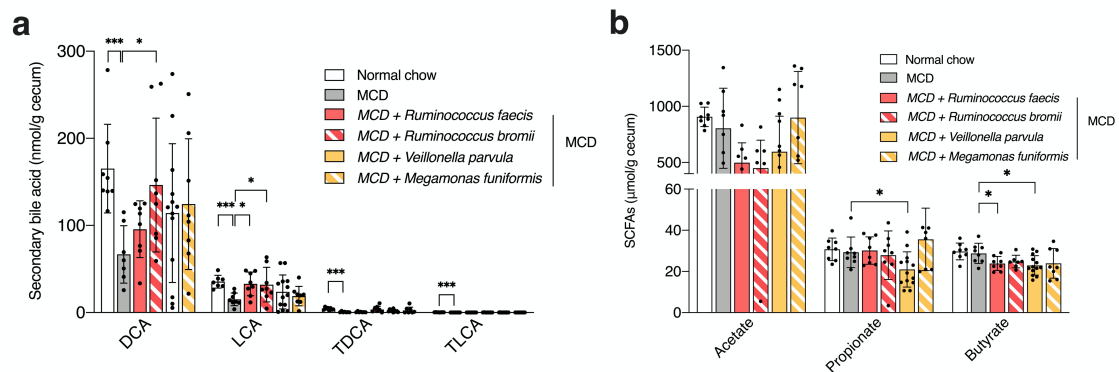

**Supplementary Figure 13 Comparison of cecum bile acid or SCFAs profiles of bacteria-treated mice.** After bacteria treatment with MCD diet for 5 weeks, bile acid levels were measured in cecal samples and were compared among groups. Absolute value of (a) secondary bile acids (from left, DCA,  $P=0.0003$ ,  $0.0205$ ,  $n=8, 7, 8, 8, 13, 8$ ; LCA,  $P=0.0006$ ,  $0.0104$ ,  $0.0281$ ,  $n=7, 8, 8, 8, 13, 8$ ; TDCA,  $P=0.0003$ ,  $n=8, 7, 7, 8, 13, 8$ ; TLCA,  $P=0.0002$ ,  $n=8, 8, 8, 8, 13, 8$ ) or (b) SCFAs (from left, acetate,  $n=8, 8, 8, 8, 13, 8$ ; propionate,  $P=0.0194$ ,  $n=8, 8, 8, 8, 13, 8$ ; butyrate,  $P=0.0281$ ,  $0.0246$ ,  $n=8, 8, 8, 7, 13, 8$ ). The bar graphs indicate the mean with SD. Statistical analysis was performed using the two-sided nonparametric Mann-Whitney test. \* $P<0.05$ , \*\*\* $P<0.001$



**Supplementary Table 1 Baseline characteristics of study subjects stratified by obesity status and histological spectrum of NAFLD.**

|                                 | Non-obese (n=64)           |                             |                            |                         | Obese (n=138)               |                            |                             |                         |
|---------------------------------|----------------------------|-----------------------------|----------------------------|-------------------------|-----------------------------|----------------------------|-----------------------------|-------------------------|
|                                 | No NAFLD                   | NAFL                        | NASH                       | P-value                 | No NAFLD                    | NAFL                       | NASH                        | P-value                 |
| N (male/female)                 | 7/14                       | 13/11                       | 7/12                       |                         | 4/6                         | 37/27                      | 24/40                       |                         |
| Age (years)                     | 58.7 ± 10.7                | 58.3 ± 10.2                 | 60.2 ± 8.84                | 0.8601 <sup>ns</sup>    | 58 ± 12.6                   | 52.7 ± 14.8                | 53.6 ± 16.7                 | 0.6463 <sup>ns</sup>    |
| BMI (kg/m <sup>2</sup> )        | 22.8 ± 1.67                | 23.6 ± 1.34                 | 23.6 ± 0.83                | 0.0871 <sup>ns</sup>    | 27 ± 2.09                   | 28.8 ± 3.25                | 28.8 ± 3.02                 | 0.1374 <sup>ns</sup>    |
| WC (cm)                         | 80 ± 6.53 <sup>a</sup>     | 82.7 ± 3.45 <sup>ab</sup>   | 85.4 ± 4 <sup>b</sup>      | 0.0141 <sup>*</sup>     | 92.7 ± 5.93                 | 94.3 ± 8.04                | 96.6 ± 7.81                 | 0.2328 <sup>ns</sup>    |
| AST (IU/L)                      | 31.6 ± 24.4 <sup>a</sup>   | 28.4 ± 9.05 <sup>b</sup>    | 54.7 ± 45.7 <sup>bc</sup>  | 0.002 <sup>**</sup>     | 25.6 ± 7.5 <sup>a</sup>     | 42.3 ± 26.5 <sup>b</sup>   | 62 ± 32.3 <sup>bc</sup>     | < 0.0001 <sup>***</sup> |
| ALT (IU/L)                      | 32.5 ± 32.6 <sup>a</sup>   | 32.8 ± 17.3 <sup>b</sup>    | 59 ± 52.9 <sup>c</sup>     | < 0.0001 <sup>***</sup> | 27.8 ± 25.8 <sup>a</sup>    | 56.9 ± 48.5 <sup>b</sup>   | 79.1 ± 57.6 <sup>c</sup>    | < 0.0001 <sup>***</sup> |
| GGT (IU/L)                      | 44.6 ± 54 <sup>a</sup>     | 31.8 ± 34.1 <sup>a</sup>    | 66.7 ± 55.2 <sup>b</sup>   | 0.0016 <sup>**</sup>    | 44.7 ± 51.8 <sup>a</sup>    | 49.2 ± 57.4 <sup>a</sup>   | 78.5 ± 79.2 <sup>b</sup>    | < 0.0001 <sup>***</sup> |
| HDL cholesterol (mg/dL)         | 54 ± 14                    | 46.3 ± 10.8                 | 43.8 ± 11.7                | 0.0527 <sup>ns</sup>    | 58.9 ± 14.3 <sup>a</sup>    | 47 ± 11.6 <sup>b</sup>     | 45.5 ± 11.2 <sup>bc</sup>   | 0.0196 <sup>*</sup>     |
| LDL cholesterol (mg/dL)         | 93.5 ± 25.7                | 111 ± 39.8                  | 97.3 ± 32.1                | 0.5322 <sup>ns</sup>    | 123 ± 35.8                  | 103 ± 32.3                 | 107 ± 32.7                  | 0.1782 <sup>ns</sup>    |
| Albumin (g/dL)                  | 4.1 ± 0.285                | 4.24 ± 0.257                | 4.03 ± 0.413               | 0.1128 <sup>ns</sup>    | 4.12 ± 0.312                | 4.2 ± 0.254                | 4.15 ± 0.279                | 0.516 <sup>ns</sup>     |
| Platelet (×10 <sup>3</sup> /μL) | 223 ± 72.2 <sup>ab</sup>   | 259 ± 54.4 <sup>a</sup>     | 179 ± 79 <sup>bc</sup>     | 0.0023 <sup>**</sup>    | 232 ± 53                    | 234 ± 59.9                 | 215 ± 69                    | 0.3027 <sup>ns</sup>    |
| Ferritin (ng/mL)                | 103 ± 57.2                 | 109 ± 80.2                  | 173 ± 114                  | 0.1285 <sup>ns</sup>    | 63.8 ± 26.9 <sup>a</sup>    | 137 ± 88.4 <sup>b</sup>    | 159 ± 95.1 <sup>bc</sup>    | 0.0026 <sup>**</sup>    |
| HA (ng/mL)                      | 66.6 ± 70.2 <sup>ab</sup>  | 37.1 ± 30.2 <sup>a</sup>    | 93.9 ± 64.9 <sup>bc</sup>  | 0.0048 <sup>**</sup>    | 76.8 ± 99.2 <sup>ab</sup>   | 62.1 ± 95.4 <sup>a</sup>   | 95.7 ± 112 <sup>bc</sup>    | 0.0344 <sup>*</sup>     |
| Insulin (μU/mL)                 | 9.45 ± 3.77 <sup>a</sup>   | 11.2 ± 5.96 <sup>ab</sup>   | 13.6 ± 5.85 <sup>b</sup>   | 0.037 <sup>*</sup>      | 11.2 ± 5.55 <sup>a</sup>    | 18.1 ± 17.1 <sup>ab</sup>  | 18.2 ± 11.1 <sup>b</sup>    | 0.0227 <sup>*</sup>     |
| HbA1c (%)                       | 5.71 ± 0.481 <sup>a</sup>  | 6.06 ± 0.676 <sup>a</sup>   | 7.12 ± 1.96 <sup>b</sup>   | < 0.0001 <sup>***</sup> | 5.72 ± 0.326 <sup>a</sup>   | 6.1 ± 0.814 <sup>ab</sup>  | 6.6 ± 1.27 <sup>b</sup>     | 0.0099 <sup>**</sup>    |
| C-peptide (ng/mL)               | 1.91 ± 0.61 <sup>a</sup>   | 2.43 ± 0.832 <sup>ab</sup>  | 2.88 ± 1.09 <sup>b</sup>   | 0.0005 <sup>***</sup>   | 2.42 ± 0.916 <sup>a</sup>   | 4.42 ± 3.4 <sup>b</sup>    | 4.19 ± 2.39 <sup>bc</sup>   | 0.0087 <sup>**</sup>    |
| HOMA-IR                         | 2.56 ± 1.17 <sup>a</sup>   | 3.12 ± 1.72 <sup>ab</sup>   | 4.39 ± 2.19 <sup>bc</sup>  | 0.0085 <sup>**</sup>    | 2.92 ± 1.77 <sup>a</sup>    | 4.96 ± 4.36 <sup>ab</sup>  | 5.77 ± 4.42 <sup>bc</sup>   | 0.0131 <sup>*</sup>     |
| Adipo-IR                        | 4.68 ± 2.85 <sup>a</sup>   | 6.6 ± 3.59 <sup>ab</sup>    | 9.63 ± 5.39 <sup>bc</sup>  | 0.0027 <sup>**</sup>    | 6.42 ± 3.28 <sup>a</sup>    | 10.1 ± 10.1 <sup>ab</sup>  | 12.8 ± 9.51 <sup>bc</sup>   | 0.0096 <sup>**</sup>    |
| FFA (μEq/L)                     | 493 ± 166 <sup>ab</sup>    | 620 ± 240 <sup>a</sup>      | 720 ± 268 <sup>bc</sup>    | 0.0121 <sup>*</sup>     | 605 ± 289 <sup>a</sup>      | 603 ± 259 <sup>ab</sup>    | 712 ± 238 <sup>bc</sup>     | 0.0089 <sup>**</sup>    |
| hsCRP (mg/dL)                   | 0.249 ± 0.428 <sup>a</sup> | 0.0896 ± 0.066 <sup>a</sup> | 0.354 ± 0.549 <sup>b</sup> | 0.0119 <sup>*</sup>     | 0.152 ± 0.154 <sup>ab</sup> | 0.206 ± 0.403 <sup>a</sup> | 0.278 ± 0.336 <sup>bc</sup> | 0.0294 <sup>*</sup>     |
| Cholesterol (mg/dL)             | 167 ± 28.2                 | 185 ± 41.8                  | 167 ± 42.9                 | 0.3932 <sup>ns</sup>    | 200 ± 43.2                  | 183 ± 34.8                 | 181 ± 40.7                  | 0.4122 <sup>ns</sup>    |
| TG (mg/dL)                      | 102 ± 47 <sup>a</sup>      | 140 ± 44.7 <sup>b</sup>     | 141 ± 70.9 <sup>ab</sup>   | 0.0105 <sup>*</sup>     | 87 ± 34 <sup>a</sup>        | 161 ± 82.2 <sup>b</sup>    | 151 ± 61.9 <sup>bc</sup>    | 0.0024 <sup>**</sup>    |

|                 |            |            |            |                       |            |            |            |                      |
|-----------------|------------|------------|------------|-----------------------|------------|------------|------------|----------------------|
| FPG (mg/dL)     | 110 ± 25.6 | 113 ± 28.8 | 132 ± 42.5 | 0.0986 <sup>ns</sup>  | 102 ± 14.1 | 113 ± 27.4 | 128 ± 55.8 | 0.2074 <sup>ns</sup> |
| HTN, n (%)      | 8 (38.1)   | 8 (33.3)   | 9 (47.4)   | 0.641 <sup>ns</sup>   | 4 (40.0)   | 24 (37.5)  | 32 (50.0)  | 0.352 <sup>ns</sup>  |
| Diabetes, n (%) | 1 (4.76)   | 8 (33.3)   | 13 (68.4)  | 0.0001 <sup>***</sup> | 1 (10.0)   | 19 (29.7)  | 30 (46.9)  | 0.026 <sup>*</sup>   |

Abbreviations: BMI, body mass index; WC, waist circumference; AST, aspartate transaminase; ALT, alanine transaminase; GGT, gamma-glutamyl transferase; NAS, nonalcoholic fatty liver disease activity score; HDL, high-density lipoprotein; LDL, low-density lipoprotein; HA, hyaluronic acid; HbA1c, glycosylated hemoglobin; HOMA-IR, homeostasis model assessment of insulin resistance; Adipo-IR, adipose tissue insulin resistance; FFA, free fatty acid; hsCRP, high-sensitivity C-reactive protein; TG, triglycerides; FPG, fasting plasma glucose; HTN, hypertension. Data are expressed as the mean ± SD or n (%). Mean ± SD or n (%) with different superscript letters indicates significant difference by the nonparametric Kruskal-Wallis test with Dunn's multiple comparison test or the chi-square test. \* $P < 0.05$ , \*\* $P < 0.01$ , \*\*\* $P < 0.001$

**Supplementary Table 2 Baseline characteristics of study subjects stratified by obesity status and fibrosis severity.**

| Fibrosis stage                  | Non-obese (n=64)            |                              |                             | P-value          | Obese (n=138)                |                               |                              | P-value          |
|---------------------------------|-----------------------------|------------------------------|-----------------------------|------------------|------------------------------|-------------------------------|------------------------------|------------------|
|                                 | 0                           | 1                            | ≥ 2                         |                  | 0                            | 1                             | ≥ 2                          |                  |
| N (male/female)                 | 27 (11/16)                  | 20 (9/11)                    | 17 (7/10)                   |                  | 25 (17/8)                    | 73 (38/35)                    | 40 (10/30)                   |                  |
| Age (years)                     | 57.67 ± 9.01                | 57.85 ± 11.80                | 62.47 ± 8.32                | 0.2371 <i>ns</i> | 57.08 ± 12.41 <sup>ab</sup>  | 48.36 ± 15.70 <sup>a</sup>    | 60.63 ± 13.56 <sup>b</sup>   | 0.0001 ***       |
| BMI (kg/m <sup>2</sup> )        | 22.81 ± 1.42 <sup>a</sup>   | 23.76 ± 1.46 <sup>b</sup>    | 23.71 ± 0.92 <sup>ab</sup>  | 0.0084 **        | 27.48 ± 2.58 <sup>a</sup>    | 29.30 ± 3.20 <sup>b</sup>     | 28.27 ± 2.97 <sup>ab</sup>   | 0.0119 *         |
| WC (cm)                         | 79.95 ± 5.2 <sup>a</sup>    | 83.22 ± 3.53 <sup>ab</sup>   | 86.33 ± 4.22 <sup>b</sup>   | 0.0010 **        | 91.82 ± 6.56                 | 96.16 ± 7.35                  | 95.73 ± 8.98                 | 0.0074 <i>ns</i> |
| AST (IU/L)                      | 29.11 ± 21.64 <sup>a</sup>  | 32.20 ± 10.63 <sup>ab</sup>  | 56.06 ± 48.13 <sup>b</sup>  | 0.0017 **        | 28.40 ± 13.03 <sup>a</sup>   | 48.99 ± 26.74 <sup>b</sup>    | 66.13 ± 36.43 <sup>c</sup>   | < 0.0001 ***     |
| ALT (IU/L)                      | 31.89 ± 27.83               | 39.10 ± 30.99                | 55.71 ± 52.04               | 0.0886 <i>ns</i> | 38.88 ± 43.67 <sup>a</sup>   | 70.85 ± 53.02 <sup>bc</sup>   | 70.85 ± 56.63 <sup>c</sup>   | 0.0003 ***       |
| GGT (IU/L)                      | 33.6 ± 41.4 <sup>a</sup>    | 44 ± 46.2 <sup>ab</sup>      | 69.7 ± 58.3 <sup>b</sup>    | 0.0046 **        | 39.6 ± 41 <sup>a</sup>       | 57.5 ± 56.1 <sup>ab</sup>     | 85.9 ± 95.2 <sup>b</sup>     | 0.0016 **        |
| HDL-cholesterol (mg/dL)         | 51.4 ± 13.4                 | 47.9 ± 11.1                  | 43.1 ± 12.3                 | 0.1701 <i>ns</i> | 48.4 ± 13.1                  | 47.2 ± 12                     | 46.3 ± 11.5                  | 0.9175 <i>ns</i> |
| LDL-cholesterol (mg/dL)         | 104 ± 29.9                  | 108 ± 38.6                   | 90.8 ± 32.3                 | 0.3250 <i>ns</i> | 105 ± 35.7                   | 109 ± 31.7                    | 102 ± 33.8                   | 0.5024 <i>ns</i> |
| Albumin (g/dL)                  | 4.14 ± 0.25                 | 4.22 ± 0.29                  | 3.99 ± 0.43                 | 0.1781 <i>ns</i> | 4.12 ± 0.24 <sup>ab</sup>    | 4.24 ± 0.26 <sup>a</sup>      | 4.08 ± 0.27 <sup>b</sup>     | 0.0027 **        |
| Platelet (×10 <sup>3</sup> /μL) | 230.19 ± 48.76 <sup>a</sup> | 247.75 ± 74.84 <sup>a</sup>  | 183.88 ± 95.35 <sup>b</sup> | 0.0255 *         | 238.2 ± 55.38 <sup>a</sup>   | 241.44 ± 62.49 <sup>a</sup>   | 188.33 ± 58.05 <sup>b</sup>  | 0.0001 ***       |
| Ferritin (ng/mL)                | 117.75 ± 73.97              | 100.94 ± 74.93               | 282.19 ± 386.91             | 0.053 <i>ns</i>  | 145.55 ± 89.51               | 219.37 ± 255.97               | 169.26 ± 133.32              | 0.8403 <i>ns</i> |
| HA (ng/mL)                      | 33.08 ± 19.62 <sup>a</sup>  | 64.2 ± 67.47 <sup>a</sup>    | 109.59 ± 65.56 <sup>b</sup> | 0.0002 ***       | 51.32 ± 66.4 <sup>a</sup>    | 61.58 ± 90.48 <sup>a</sup>    | 127.28 ± 129.4 <sup>b</sup>  | 0.0001 ***       |
| Insulin (μU/mL)                 | 10.76 ± 5.57                | 10.05 ± 4.15                 | 13.71 ± 6.19                | 0.1103 <i>ns</i> | 14.22 ± 11.57 <sup>a</sup>   | 17.83 ± 15.46 <sup>ab</sup>   | 19.50 ± 12.58 <sup>b</sup>   | 0.0148 *         |
| HbA1c (%)                       | 5.86 ± 0.69 <sup>a</sup>    | 5.98 ± 0.44 <sup>ab</sup>    | 7.23 ± 2.05 <sup>c</sup>    | 0.0007 ***       | 5.87 ± 0.54 <sup>a</sup>     | 6.15 ± 0.85 <sup>ab</sup>     | 6.87 ± 1.42 <sup>c</sup>     | 0.0007 ***       |
| C-peptide (ng/mL)               | 2.23 ± 0.87 <sup>a</sup>    | 2.23 ± 0.64 <sup>ab</sup>    | 2.85 ± 1.17 <sup>bc</sup>   | 0.0256 *         | 3.22 ± 1.57 <sup>a</sup>     | 4.43 ± 3.43 <sup>ab</sup>     | 4.29 ± 2.28 <sup>bc</sup>    | 0.0498 *         |
| HOMA-IR                         | 2.94 ± 1.61 <sup>a</sup>    | 2.81 ± 1.33 <sup>ab</sup>    | 4.50 ± 2.28 <sup>b</sup>    | 0.0207 *         | 3.84 ± 3.35 <sup>a</sup>     | 4.82 ± 4.18 <sup>ac</sup>     | 6.69 ± 4.70 <sup>b</sup>     | 0.0006 ***       |
| Adipo-IR                        | 5.72 ± 3.01                 | 6.33 ± 3.72                  | 9.49 ± 5.95                 | 0.0645 <i>ns</i> | 7.48 ± 6.2 <sup>a</sup>      | 10.76 ± 9.7 <sup>ab</sup>     | 13.86 ± 10.55 <sup>bc</sup>  | 0.0043 **        |
| FFA (μEq/L)                     | 553.96 ± 186.66             | 615.65 ± 238.13              | 684.88 ± 308.55             | 0.2678 <i>ns</i> | 556.08 ± 209.52 <sup>a</sup> | 642.76 ± 257.61 <sup>ab</sup> | 737.1 ± 259.42 <sup>bc</sup> | 0.0059 **        |
| hsCRP (mg/dL)                   | 0.17 ± 0.33 <sup>a</sup>    | 0.23 ± 0.41 <sup>ab</sup>    | 0.29 ± 0.48 <sup>bc</sup>   | 0.0186 *         | 0.14 ± 0.17 <sup>a</sup>     | 0.23 ± 0.39 <sup>b</sup>      | 0.3 ± 0.39 <sup>bc</sup>     | 0.0121 *         |
| Cholesterol (mg/dL)             | 177.7 ± 28                  | 180.75 ± 43.68               | 158.53 ± 44.94              | 0.1860 <i>ns</i> | 180.96 ± 38.04               | 188.58 ± 34.01                | 175.33 ± 44.67               | 0.2143 <i>ns</i> |
| TG (mg/dL)                      | 120.70 ± 45.23              | 128.42 ± 51.84               | 137.12 ± 77.04              | 0.9889 <i>ns</i> | 127.36 ± 51.42               | 156.23 ± 80.68                | 155.43 ± 67.19               | 0.2363 <i>ns</i> |
| FPG (mg/dL)                     | 111.15 ± 31.51 <sup>a</sup> | 111.85 ± 19.58 <sup>ab</sup> | 134.47 ± 43.79 <sup>b</sup> | 0.0402 *         | 110.96 ± 34.36 <sup>a</sup>  | 107.82 ± 21.43 <sup>a</sup>   | 144.53 ± 63.53 <sup>b</sup>  | 0.0001 ***       |
| HTN, n (%)                      | 7 (25.9)                    | 9 (45.0)                     | 9 (52.9)                    | 0.163 <i>ns</i>  | 9 (36.0)                     | 30 (41.1)                     | 21 (52.5)                    | 0.357 <i>ns</i>  |

|                 |          |          |           |            |          |           |           |            |
|-----------------|----------|----------|-----------|------------|----------|-----------|-----------|------------|
| Diabetes, n (%) | 4 (14.8) | 5 (25.0) | 13 (76.5) | 0.0001 *** | 3 (12.0) | 23 (31.5) | 24 (60.0) | 0.0002 *** |
|-----------------|----------|----------|-----------|------------|----------|-----------|-----------|------------|

Abbreviations: BMI, body mass index, WC, waist circumference; AST, aspartate transaminase; ALT, alanine transaminase; GGT, gamma-glutamyl transferase; HDL, high-density lipoprotein; LDL, low-density lipoprotein; HA, hyaluronic acid; HbA1c, glycosylated hemoglobin; HOMA-IR, homeostasis model assessment of insulin resistance; Adipo-IR, adipose tissue insulin resistance; FFA, free fatty acid; hsCRP, high-sensitivity C-reactive protein; TG, triglycerides; FPG, fasting plasma glucose; HTN, hypertension. Data are expressed as the mean  $\pm$  SD or n (%). Mean  $\pm$  SD or n (%) with different superscript letters indicates significant difference by the nonparametric Kruskal-Wallis test with Dunn's multiple comparison test or the chi-square test. \* $P$ <0.05, \*\* $P$ <0.01, \*\*\* $P$ <0.001

**Supplementary Table 3 Histological characteristics of study subjects stratified by obesity status and fibrosis severity.**

| Fibrosis stage                     | Non-obese (n=64) |             |             | Obese (n=138) |             |             |
|------------------------------------|------------------|-------------|-------------|---------------|-------------|-------------|
|                                    | 0                | 1           | ≥ 2         | 0             | 1           | ≥ 2         |
| Steatosis, n (%)                   |                  |             |             |               |             |             |
| 0 (<5%)                            | 15 (55.6)        | 5 (25.0)    | 1 (5.9)     | 7 (28.0)      | 2 (2.7)     | 1 (2.5)     |
| 1 (5–33%)                          | 7 (25.9)         | 6 (30.0)    | 8 (47.1)    | 12 (48.0)     | 9 (12.3)    | 13 (32.5)   |
| 2 (34–66%)                         | 4 (14.8)         | 7 (35.0)    | 2 (11.8)    | 3 (12.0)      | 29 (39.7)   | 12 (30.0)   |
| 3 (>66%)                           | 1 (3.7)          | 2 (10.0)    | 6 (35.3)    | 3 (12.0)      | 33 (45.2)   | 14 (35.0)   |
| Lobular inflammation, n (%)        |                  |             |             |               |             |             |
| 0                                  | 15 (55.6)        | 3 (15.0)    | 1 (5.9)     | 13 (52.0)     | 5 (6.9)     | 3 (7.5)     |
| 1                                  | 12 (44.4)        | 14 (70.0)   | 11 (64.7)   | 12 (48.0)     | 60 (82.2)   | 30 (75.0)   |
| 2–3                                | 0                | 3 (15.0)    | 5 (29.4)    | 0             | 8 (11.0)    | 7 (17.5)    |
| Ballooning, n (%)                  |                  |             |             |               |             |             |
| 0                                  | 22 (81.5)        | 7 (35.0)    | 0           | 22 (88.0)     | 18 (24.7)   | 5 (12.5)    |
| 1–2                                | 5 (18.5)         | 13 (65.0)   | 17 (100.0)  | 3 (12.0)      | 55 (75.3)   | 35 (87.5)   |
| Histological classification, n (%) |                  |             |             |               |             |             |
| No NAFLD                           | 15 (55.6)        | 5 (25.0)    | 1 (5.9)     | 7 (28.0)      | 2 (2.7)     | 0           |
| NAFL                               | 11 (40.7)        | 13 (65.0)   | 0           | 18 (72.0)     | 40 (54.8)   | 7 (17.5)    |
| NASH                               | 1 (3.7)          | 2 (10.0)    | 16 (94.1)   | 0             | 31 (42.5)   | 33 (82.5)   |
| NAS                                | 1.30 ± 1.46      | 2.95 ± 1.61 | 4.00 ± 1.32 | 1.68 ± 1.22   | 4.11 ± 1.23 | 4.08 ± 1.10 |

Abbreviations: NAFLD, nonalcoholic fatty liver disease; NAFL, nonalcoholic fatty liver; NASH, nonalcoholic steatohepatitis; NAS, NAFLD activity score. Data are expressed as the mean ± SD or n (%).

**Supplementary Table 4 Baseline clinical, metabolic, histological, and genetic characteristics of study subjects stratified by obesity status and fibrosis stage.**

| Fibrosis stage                     | Non-obese (n=64) |              |              |              |              | Obese (n=138) |              |              |              |              |           |
|------------------------------------|------------------|--------------|--------------|--------------|--------------|---------------|--------------|--------------|--------------|--------------|-----------|
|                                    | 0                | 1            | 2            | 3            | 4            | 0             | 1            | 2            | 3            | 4            |           |
| N (male/female)                    | 27 (11/16)       | 20 (9/11)    | 9 (5/4)      | 4 (1/3)      | 4 (1/3)      | 25 (17/8)     | 73 (38/35)   | 20 (5/15)    | 7 (2/5)      | 13 (3/10)    |           |
| Age (years)                        | 57.7 ± 9.01      | 57.8 ± 11.8  | 58.6 ± 9.9   | 67.2 ± 2.5   | 66.5 ± 1.73  | 57.1 ± 12.4   | 48.4 ± 15.7  | 55.6 ± 16.4  | 65.6 ± 8.89  | 65.8 ± 6.92  |           |
| BMI                                | 22.8 ± 1.42      | 23.8 ± 1.46  | 23.5 ± 0.862 | 23.9 ± 1.33  | 24 ± 0.66    | 27.5 ± 2.58   | 29.3 ± 3.2   | 28.5 ± 3.26  | 28 ± 3.43    | 28 ± 2.39    |           |
| WC (cm)                            | 79.9 ± 5.2       | 83.2 ± 3.53  | 85.5 ± 2.27  | 88.1 ± 4.3   | 86.1 ± 8.37  | 91.8 ± 6.55   | 96.2 ± 7.35  | 95.8 ± 9.02  | 95.8 ± 13.2  | 95.6 ± 7.76  |           |
| SBP (mm Hg)                        | 128 ± 16.9       | 127 ± 14.3   | 132 ± 17.1   | 158 ± 37.4   | 124 ± 21.7   | 130 ± 14.8    | 136 ± 18.4   | 133 ± 17     | 132 ± 11.3   | 126 ± 17.9   |           |
| DBP (mm Hg)                        | 76.8 ± 12.8      | 77.4 ± 8.26  | 80.2 ± 12.9  | 86.8 ± 19.1  | 74.5 ± 10.8  | 80 ± 9.78     | 84.1 ± 11.8  | 77.4 ± 13.4  | 77 ± 10.8    | 74.3 ± 9.55  |           |
| AST (IU/L)                         | 29.1 ± 21.6      | 32.2 ± 10.6  | 55.1 ± 55.8  | 80.5 ± 50.1  | 33.8 ± 8.34  | 28.4 ± 13     | 49 ± 26.7    | 66.6 ± 46.5  | 70.4 ± 27.9  | 63 ± 21.7    |           |
| ALT (IU/L)                         | 31.9 ± 27.8      | 39.1 ± 31    | 52.6 ± 53.2  | 93.5 ± 60.5  | 25 ± 7.53    | 38.9 ± 43.7   | 70.8 ± 53    | 87.2 ± 74.3  | 58 ± 19.3    | 52.6 ± 24.6  |           |
| GGT (IU/L)                         | 33.6 ± 41.4      | 44 ± 46.2    | 69.7 ± 64    | 373 ± 592    | 63 ± 43.8    | 39.6 ± 41     | 57.5 ± 56.1  | 79.4 ± 86.1  | 86.6 ± 68.5  | 95.6 ± 123   |           |
| Insulin (μIU/mL)                   | 10.8 ± 5.57      | 10 ± 4.15    | 15 ± 6.14    | 15.3 ± 7.18  | 9.32 ± 4.29  | 14.2 ± 11.6   | 17.8 ± 15.5  | 21.3 ± 16.1  | 13.5 ± 4.73  | 20 ± 8.1     |           |
| HbA1c (%)                          | 5.86 ± 0.688     | 5.98 ± 0.445 | 6.8 ± 0.689  | 6.05 ± 0.557 | 9.38 ± 3.52  | 5.87 ± 0.538  | 6.15 ± 0.851 | 7.01 ± 1.45  | 6.79 ± 1.15  | 6.74 ± 1.59  |           |
| HOMA-IR                            | 2.94 ± 1.61      | 2.81 ± 1.33  | 4.57 ± 2.05  | 4.56 ± 2.04  | 4.27 ± 3.5   | 3.84 ± 3.36   | 4.82 ± 4.18  | 7.28 ± 5.79  | 4.4 ± 1.42   | 7.01 ± 3.71  |           |
| Adipo-IR                           | 5.72 ± 3.01      | 6.33 ± 3.72  | 11.1 ± 6.82  | 8.94 ± 5.18  | 6.44 ± 4.2   | 7.48 ± 6.2    | 10.8 ± 9.7   | 14.3 ± 12.9  | 9.29 ± 7.57  | 15.1 ± 7.42  |           |
| Diabetes, n (%)                    | 4 (14.8)         | 5 (25.0)     | 7 (77.8)     | 2 (50.0)     | 4 (100)      | 3 (12.0)      | 23 (31.5)    | 12 (60.0)    | 4 (57.1)     | 8 (61.5)     |           |
| Albumin (g/dL)                     | 4.15 ± 0.259     | 4.22 ± 0.291 | 4.19 ± 0.285 | 3.92 ± 0.45  | 3.62 ± 0.499 | 4.12 ± 0.243  | 4.24 ± 0.26  | 4.11 ± 0.192 | 4.06 ± 0.207 | 4.04 ± 0.393 |           |
| Platelet (×10 <sup>3</sup> /μL)    | 230 ± 48.8       | 248 ± 74.8   | 222 ± 67.2   | 206 ± 123    | 76.8 ± 32.1  | 238 ± 55.4    | 241 ± 62.5   | 206 ± 50.6   | 195 ± 48.8   | 157 ± 63.7   |           |
| TG (mg/dL)                         | 121 ± 45.2       | 128 ± 51.8   | 180 ± 82.9   | 82.5 ± 26.6  | 96 ± 31.1    | 127 ± 51.4    | 156 ± 80.7   | 175 ± 71.5   | 140 ± 48.6   | 134 ± 64.5   |           |
| FPG (mg/dL)                        | 111 ± 31.5       | 112 ± 19.6   | 123 ± 26.7   | 123 ± 37     | 172 ± 66.6   | 111 ± 34.4    | 108 ± 21.4   | 148 ± 78.3   | 138 ± 30.6   | 143 ± 53.9   |           |
| <b>Histological classification</b> |                  |              |              |              |              |               |              |              |              |              |           |
| No NAFLD                           | 15 (55.6)        | 5 (25.0)     | 0            | 1 (25.0)     | 0            | 7 (28.0)      | 2 (2.7)      | 0            | 0            | 0            |           |
| NAFL                               | 11 (40.7)        | 13 (65.0)    | 0            | 0            | 0            | 18 (72.0)     | 40 (54.8)    | 6 (30.0)     | 1 (14.3)     | 0            |           |
| NASH                               | 1 (3.7)          | 2 (10.0)     | 9 (100)      | 3 (75.0)     | 4 (100)      | 0             | 31 (42.5)    | 14 (70.0)    | 6 (85.7)     | 13 (100)     |           |
| <b>Genetic variants</b>            |                  |              |              |              |              |               |              |              |              |              |           |
| <i>PNPLA3</i><br>(rs738409)        | G/G              | 6 (22.2)     | 4 (20.0)     | 1 (11.1)     | 0            | 2 (50.0)      | 4 (27.4)     | 20 (27.4)    | 11 (55.0)    | 2 (28.6)     | 6 (46.2)  |
|                                    | C/G              | 13 (38.1)    | 13 (65.0)    | 5 (55.6)     | 1 (25.0)     | 2 (50.0)      | 11 (44.0)    | 35 (47.9)    | 4 (20.0)     | 4 (57.1)     | 4 (30.8)  |
|                                    | C/C              | 7 (25.9)     | 3 (15.0)     | 2 (22.2)     | 3 (75.0)     | 0             | 7 (17.8)     | 13 (17.8)    | 4 (20.0)     | 1 (14.3)     | 1 (7.7)   |
| <i>TM6SF2</i><br>(rs58542926)      | C/C              | 21 (77.8)    | 18 (90.0)    | 6 (66.7)     | 2 (50.0)     | 3 (75.0)      | 18 (72.0)    | 56 (76.7)    | 16 (80.0)    | 4 (57.1)     | 10 (76.9) |
|                                    | C/T              | 5 (18.5)     | 2 (10.0)     | 2 (22.2)     | 2 (50.0)     | 1 (25.0)      | 4 (16.0)     | 11 (15.1)    | 3 (15.0)     | 2 (28.6)     | 1 (7.7)   |

|                                  |     |           |           |          |          |          |           |           |           |          |          |
|----------------------------------|-----|-----------|-----------|----------|----------|----------|-----------|-----------|-----------|----------|----------|
|                                  | T/T | 0         | 0         | 0        | 0        | 0        | 0         | 1 (1.4)   | 0         | 1 (14.3) | 0        |
| <i>MBOAT7-TMC4</i><br>(rs641738) | C/C | 17 (63.0) | 13 (65.0) | 5 (55.6) | 1 (25.0) | 4 (100)  | 15 (60.0) | 42 (57.5) | 11 (55.0) | 3 (42.9) | 7 (53.8) |
|                                  | C/T | 9 (33.3)  | 5 (25.0)  | 3 (33.3) | 3 (75.0) | 0        | 4 (16.0)  | 21 (28.8) | 8 (40.0)  | 4 (57.1) | 4 (30.8) |
|                                  | T/T | 0         | 2 (10.0)  | 0        | 0        | 0        | 3 (12.0)  | 5 (6.8)   | 0         | 0        | 0        |
| <i>SREBF-2</i><br>(rs133291)     | C/C | 7 (25.9)  | 6 (30.0)  | 1 (11.1) | 2 (50.0) | 2 (50.0) | 6 (24.0)  | 23 (31.5) | 8 (40.0)  | 1 (14.3) | 3 (23.1) |
|                                  | C/T | 12 (44.4) | 8 (40.0)  | 6 (66.7) | 1 (25.0) | 2 (50.0) | 7 (28.0)  | 27 (37.0) | 5 (25.0)  | 5 (71.4) | 5 (38.5) |
|                                  | T/T | 3 (11.1)  | 6 (30.0)  | 1 (11.1) | 1 (25.0) | 0        | 3 (12.0)  | 8 (11.0)  | 4 (20.0)  | 1 (14.3) | 2 (15.4) |

Abbreviations: BMI, body mass index; WC, waist circumference; SBP, systolic blood pressure; DBP, diastolic blood pressure; AST, aspartate transaminase; ALT, alanine transaminase; GGT, gamma-glutamyl transferase; HbA1c, glycosylated hemoglobin; HOMA-IR, homeostasis model assessment of insulin resistance; Adipo-IR, adipose tissue insulin resistance; TG, triglycerides; FPG, fasting plasma glucose; NAFLD, nonalcoholic fatty liver disease; NASH, nonalcoholic steatohepatitis; PNPLA3, patatin-like phospholipase domain-containing protein 3; TM6SF2, transmembrane 6 superfamily 2; MBOAT7-TMC4, membrane bound O-acyltransferase domain-containing 7 gene and transmembrane channel-like 4 gene; SREBF-2, sterol regulatory element binding transcription factor 2. Data are expressed as the mean  $\pm$  SD or n (%).

**Supplementary Table 5 Medication history of study subjects stratified by obesity status and fibrosis stage.**

|                                           |              | Non-obese (n=64) |   |     | Obese (n=138) |    |     |
|-------------------------------------------|--------------|------------------|---|-----|---------------|----|-----|
| Fibrosis stage                            |              | 0                | 1 | ≥ 2 | 0             | 1  | ≥ 2 |
| <b>Diabetes, n</b>                        |              | 4                | 4 | 13  | 3             | 23 | 24  |
| Class of medication                       | Agent        |                  |   |     |               |    |     |
| Biguanide                                 | Metformin    | 2                | 4 | 8   | 1             | 16 | 16  |
|                                           | Vildagliptin | 1                |   | 1   |               |    | 3   |
| Dipeptidyl peptidase 4 (DPP-IV) inhibitor | Gemigliptin  |                  | 1 | 1   |               |    | 3   |
|                                           | Sitagliptin  |                  |   |     |               | 2  | 4   |
|                                           | Saxagliptin  |                  |   |     |               | 1  |     |
|                                           | Linagliptin  |                  | 1 | 4   |               | 2  | 1   |
| Sulfonylurea (SU)                         | Glimepiride  | 1                |   | 4   | 1             | 5  | 7   |
|                                           | Gliclazide   |                  |   | 1   |               |    | 2   |
| Alpha-glucosidase inhibitor               | Acarbose     |                  |   |     |               |    |     |
| Thiazolidinedione (TZD)                   | Pioglitazone |                  |   |     |               | 1  | 1   |

Dual or triple combination therapy was also included.



**Supplementary Table 6 Baseline characteristics of validation cohort subjects<sup>31</sup> stratified by obesity status and fibrosis severity.**

|                          | Advanced fibrosis (BMI<30, n=107) |             |                 | Advanced fibrosis (BMI≥30, n=61) |             |                      |
|--------------------------|-----------------------------------|-------------|-----------------|----------------------------------|-------------|----------------------|
|                          | No                                | Yes         | <i>P</i> -value | No                               | Yes         | <i>P</i> -value      |
| N (male/female)          | 91 (23/68)                        | 16 (2/14)   |                 | 39 (14/25)                       | 22 (9/13)   |                      |
| Age (years)              | 45.0 ± 18.6                       | 63.6 ± 14.4 | < 0.0001 ***    | 50.2 ± 13.8                      | 64 ± 11.8   | 0.0003 ***           |
| BMI (kg/m <sup>2</sup> ) | 24.4 ± 3.1                        | 26.2 ± 2.3  | 0.0292 *        | 38.4 ± 12.3                      | 37.0 ± 5.54 | 0.8087 <sup>ns</sup> |
| Race                     |                                   |             |                 |                                  |             |                      |
| White                    | 72                                | 4           |                 | 16                               | 12          |                      |
| Hispanic                 | 17                                | 12          |                 | 23                               | 10          |                      |
| Black                    | 2                                 | 0           |                 | 0                                | 0           |                      |

Data are expressed as the mean ± SD or n. Statistical analysis was performed using the two-sided Mann-Whitney test. \**P*<0.05, \*\*\**P*<0.001

**Supplementary Table 7 Comparison of bile acids levels measured in the cecum of mice.**

|                        |              | Normal chow |                 |               | MCD            | MCD + <i>R.faecis</i> |             | MCD + <i>R.bromii</i> |              | MCD + <i>V.parvula</i> |             | MCD + <i>M.funiformis</i> |               |
|------------------------|--------------|-------------|-----------------|---------------|----------------|-----------------------|-------------|-----------------------|--------------|------------------------|-------------|---------------------------|---------------|
| Bile acid              |              | Mean ± SD   | <i>P</i> -value | Mean ± SD     | Mean ± SD      | <i>P</i> -value       | Mean ± SD   | <i>P</i> -value       | Mean ± SD    | <i>P</i> -value        | Mean ± SD   | <i>P</i> -value           |               |
| Primary<br>bile acid   | Unconjugated | α-MCA       | 168.9±63.46     | **<br>0.0093  | 67.22±58.92    | 57.1±31.39            | 0.7789      | 70.93±45.53           | 0.5358       | 94.44±85.51            | 0.3507      | 32.64±28.92               | 0.2319        |
|                        |              | β-MCA       | 264.43±79.64    | *<br>0.0499   | 905.83±1029.09 | 389.03±197.19         | 0.5737      | 376.67±164.81         | 0.4418       | 783.93±413.19          | 0.4137      | 88±93.85                  | ***<br>0.0002 |
|                        |              | ω-MCA       | 881.6±257.39    | ***<br>0.0002 | 132.76±146.57  | 34.55±30.55           | 0.281       | 102.96±73.27          | 0.7984       | 47.51±78.5             | 0.3599      | 42.41±59.89               | 0.0939        |
|                        |              | CA          | 35.3±21.36      | *<br>0.0148   | 103.13±54.96   | 100.32±52.37          | 0.7984      | 64.73±26.66           | 0.2786       | 90.34±52.79            | 0.6452      | 32.25±14.11               | **<br>0.0030  |
|                        | Conjugated   | CDCA        | 3.03±1.46       | 0.3823        | 2.56±2.77      | 5.5±4.68              | 0.2786      | 6.01±6.41             | 0.1893       | 2.62±2.76              | 0.7168      | 6.02±8.76                 | 0.5054        |
|                        |              | UDCA        | 12.52±3.66      | ***<br>0.0002 | 3.08±2.13      | 7.81±7.04             | 0.3282      | 4.73±3.29             | 0.3282       | 3.68±2.63              | 0.6452      | 1.85±1.07                 | 0.1374        |
|                        |              | Tα-MCA      | 9.85±3.18       | 0.6454        | 10.89±8.85     | 8.09±8.69             | 0.3823      | 13.38±8.71            | 0.7209       | 8.32±6.57              | 0.5002      | 13.63±10.9                | 0.9591        |
|                        |              | Tβ-MCA      | 5.53±2.48       | *<br>0.0205   | 11.81±7.81     | 13.48±6.93            | 0.2671      | 22.44±7.78            | **<br>0.0093 | 22.56±10               | *<br>0.0236 | 19.01±15.71               | 0.6943        |
|                        |              | TCA         | 7.94±2.72       | *<br>0.0140   | 3.9±2.54       | 3.55±1.89             | 0.9551      | 4.25±1.71             | 0.5358       | 6.45±3.67              | 0.1146      | 1.2±1.07                  | *<br>0.0111   |
|                        |              | TUDCA       | 2.57±0.8        | ***<br>0.0007 | 0.27±0.05      | 0.32±0.09             | 0.2388      | 0.5±0.18              | **<br>0.0020 | 0.51±0.22              | *<br>0.0101 | 0.4±0.29                  | 0.5495        |
| Secondary<br>bile acid | Unconjugated | DCA         | 165.27±50.93    | ***<br>0.0003 | 66.74±32.92    | 95.68±32.63           | 0.0939      | 146.4±76.75           | *<br>0.0205  | 114.17±79.65           | 0.1348      | 124.5±75                  | 0.152         |
|                        |              | LCA         | 35.43±7.36      | ***<br>0.0006 | 15.14±7.28     | 32.94±13.6            | *<br>0.0104 | 32.05±19.91           | *<br>0.0281  | 23.74±19.5             | 0.5466      | 18.96±11.14               | 0.4418        |
|                        | Conjugated   | TDCA        | 4.29±1.47       | ***<br>0.0003 | 0.63±0.58      | 2.09±2.07             | 0.2319      | 3.52±3.65             | 0.1893       | 1.54±1.64              | 0.3929      | 2.42±3.67                 | 0.8665        |
|                        |              | TLCA        | 0.31±0.09       | ***<br>0.0002 | 0.06±0.05      | 0.19±0.18             | 0.3899      | 0.11±0.09             | 0.4855       | 0.07±0.07              | 0.9577      | 0.02±0.02                 | 0.0684        |

Abbreviations: CA, cholic acid; CDCA, chenodeoxycholic acid; DCA, deoxycholic acid; LCA lithocholic acid; UDCA, ursodeoxycholic acid; TCA, taurocholic acid; TLCA, tauro-lithocholic acid; TDCA, taurodeoxycholic acid; TUDCA, tauro-ursodeoxycholic acid; GCDCA, glycochenodeoxycholic acid; GDCA, glycodeoxycholic acid; GUDCA, glyco-ursodeoxycholic acid; GCA, glycocholic acid; α-MCA, α-muricholic acid; β-MCA, β-muricholic acid; ω-MCA, ω-muricholic acid; Tα-MCA, tauro-α-muricholic acid; Tβ-MCA, tauro-β-muricholic acid. Data are expressed as the mean ± SD or n. Statistical analysis was performed between the MCD group and the other groups using the two-sided Mann-Whitney test. \**P*<0.05, \*\**P*<0.05, \*\*\**P*<0.001

### Supplementary References

- 1 Kashyap, S. *et al.* A sustained increase in plasma free fatty acids impairs insulin secretion in nondiabetic subjects genetically predisposed to develop type 2 diabetes. *Diabetes* **52**, 2461-2474 (2003).
- 2 Matthews, D. *et al.* Homeostasis model assessment: insulin resistance and  $\beta$ -cell function from fasting plasma glucose and insulin concentrations in man. *Diabetologia* **28**, 412-419 (1985).
- 3 Sterling, R. K. *et al.* Development of a simple noninvasive index to predict significant fibrosis in patients with HIV/HCV coinfection. *Hepatology* **43**, 1317-1325 (2006).
- 4 Kim, D. & Kim, W. R. Nonobese fatty liver disease. *Clin. Gastroenterol. Hepatol.* **15**, 474-485 (2017).
- 5 Koo, B. K. *et al.* Additive effects of PNPLA3 and TM6SF2 on the histological severity of non-alcoholic fatty liver disease. *J. Gastroenterol. Hepatol.* **33**, 1277-1285 (2018).
- 6 Romeo, S. *et al.* Genetic variation in PNPLA3 confers susceptibility to nonalcoholic fatty liver disease. *Nat. Genet.* **40**, 1461-1465 (2008).
- 7 Valenti, L. *et al.* Homozygosity for the patatin-like phospholipase-3/adiponutrin I148M polymorphism influences liver fibrosis in patients with nonalcoholic fatty liver disease. *Hepatology* **51**, 1209-1217 (2010).
- 8 Sookoian, S. & Pirola, C. J. Meta-analysis of the influence of I148M variant of patatin-like phospholipase domain containing 3 gene (PNPLA3) on the susceptibility and histological severity of nonalcoholic fatty liver disease. *Hepatology* **53**, 1883-1894 (2011).
- 9 Kozlitina, J. *et al.* Exome-wide association study identifies a TM6SF2 variant that confers susceptibility to nonalcoholic fatty liver disease. *Nat. Genet.* **46**, 352-356 (2014).
- 10 Sookoian, S. *et al.* Genetic variation in transmembrane 6 superfamily member 2 and the risk of nonalcoholic fatty liver disease and histological disease severity. *Hepatology* **61**, 515-525 (2015).

- 11 Mancina, R. M. *et al.* The MBOAT7-TMC4 variant rs641738 increases risk of nonalcoholic fatty liver disease in individuals of European descent. *Gastroenterology* **150**, 1219-1230 (2016).
- 12 Luukkonen, P. K. *et al.* The MBOAT7 variant rs641738 alters hepatic phosphatidylinositols and increases severity of non-alcoholic fatty liver disease in humans. *J. Hepatol.* **65**, 1263-1265 (2016).
- 13 Musso, G., Cassader, M., Bo, S., De Michieli, F. & Gambino, R. Sterol regulatory element-binding factor 2 (SREBF-2) predicts 7-year NAFLD incidence and severity of liver disease and lipoprotein and glucose dysmetabolism. *Diabetes* **62**, 1109-1120 (2013).
- 14 Caporaso, J. G. *et al.* Global patterns of 16S rRNA diversity at a depth of millions of sequences per sample. *Proc. Natl. Acad. Sci. U. S. A.* **108**, 4516-4522 (2011).
- 15 Caporaso, J. G. *et al.* QIIME allows analysis of high-throughput community sequencing data. *Nat. Methods* **7**, 335-336 (2010).
- 16 McDonald, D. *et al.* An improved Greengenes taxonomy with explicit ranks for ecological and evolutionary analyses of bacteria and archaea. *J. ISME* **6**, 610-618 (2012).
- 17 Caporaso, J. G. *et al.* PyNAST: a flexible tool for aligning sequences to a template alignment. *Bioinformatics* **26**, 266-267 (2010).
- 18 Cole, J. R. *et al.* The Ribosomal Database Project: improved alignments and new tools for rRNA analysis. *Nucleic Acids Res.* **37**, D141-D145 (2008).
- 19 Haas, B. J. *et al.* Chimeric 16S rRNA sequence formation and detection in Sanger and 454-pyrosequenced PCR amplicons. *Genome Res.* **21**, 494-504 (2011).
- 20 Bolger, A. M., Lohse, M. & Usadel, B. Trimmomatic: a flexible trimmer for Illumina sequence data. *Bioinformatics* **30**, 2114-2120 (2014).
- 21 Langmead, B. & Salzberg, S. L. Fast gapped-read alignment with Bowtie 2. *Nat. Methods* **9**, 357-359 (2012).
- 22 Truong, D. T. *et al.* MetaPhlan2 for enhanced metagenomic taxonomic profiling. *Nat. Methods* **12**, 902-903 (2015).
- 23 Franzosa, E. A. *et al.* Species-level functional profiling of metagenomes and

- metatranscriptomes. *Nat. Methods* **15**, 962-968 (2018).
- 24 Suzek, B. E., Huang, H., McGarvey, P., Mazumder, R. & Wu, C. H. UniRef: comprehensive and non-redundant UniProt reference clusters. *Bioinformatics* **23**, 1282-1288 (2007).
- 25 Friedman, J. & Alm, E. J. Inferring correlation networks from genomic survey data. *PLoS Comput. Biol.* **8**, e1002687 (2012).
- 26 Smoot, M. E., Ono, K., Ruscheinski, J., Wang, P. L. & Ideker, T. Cytoscape 2.8: new features for data integration and network visualization. *Bioinformatics* **27**, 431-432 (2010).
- 27 Buffie, C. G. *et al.* Precision microbiome reconstitution restores bile acid mediated resistance to *Clostridium difficile*. *Nature* **517**, 205-208 (2015).
- 28 David, L. A. *et al.* Diet rapidly and reproducibly alters the human gut microbiome. *Nature* **505**, 559-563 (2014).
- 29 Miquel, S. *et al.* Identification of metabolic signatures linked to anti-inflammatory effects of *Faecalibacterium prausnitzii*. *mBio* **6**, e00300-00315 (2015).
- 30 Duncan, S. H., Barcenilla, A., Stewart, C. S., Pryde, S. E. & Flint, H. J. Acetate utilization and butyryl coenzyme A (CoA): acetate-CoA transferase in butyrate-producing bacteria from the human large intestine. *Appl. Environ. Microbiol.* **68**, 5186-5190 (2002).
- 31 Caussy, C. *et al.* A gut microbiome signature for cirrhosis due to nonalcoholic fatty liver disease. *Nat. Commun.* **10**, 1406 (2019).
